# Supplementary material for: A novel but frequent variant in LPA KIV-2 is associated with a pronounced Lp(a) and cardiovascular risk reduction
Source: PubMed Central journal article supplement — Eur Heart J. 2017 Apr 25;38(23):1823–31. doi: 10.1093/eurheartj/ehx174 (PMC5837733; doi:10.1093/eurheartj/ehx174), 2017-04-25
Supplement: ehx174_supp.pdf [file ehx174_supp.pdf]

# Supplementary Materials to

## A novel but frequent variant in LPA KIV-2 is associated with a pronounced Lp(a) and cardiovascular risk reduction

Stefan Coassin<sup>1</sup>, Gertraud Erhart<sup>1</sup>, Hansi Weissensteiner<sup>1</sup>,  
Mariana Eca Guimarães de Araújo<sup>2</sup>, Claudia Lamina<sup>1</sup>, Sebastian Schönherr<sup>1</sup>, Lukas Forer<sup>1</sup>,  
Margot Haun<sup>1</sup>, Jamie Lee Losso<sup>1</sup>, Anna Köttgen<sup>3</sup>, Konrad Schmidt<sup>1</sup>, Gerd Utermann<sup>4</sup>,  
Annette Peters<sup>5,6,7</sup>, Christian Gieger<sup>6,8</sup>, Konstantin Strauch<sup>9,10</sup>, Armin Finkenstedt<sup>11</sup>,  
Reto Bale<sup>12</sup>, Heinz Zoller<sup>11</sup>, Bernhard Paulweber<sup>13</sup>, Kai-Uwe Eckardt<sup>14</sup>,  
Alexander Hüttenhofer<sup>15</sup>, Lukas A. Huber<sup>2</sup>, Florian Kronenberg<sup>1</sup>

<sup>1</sup> Division of Genetic Epidemiology, Department of Medical Genetics, Molecular and Clinical Pharmacology, Medical University of Innsbruck, Schoepfstrasse 41, 6020 Innsbruck, Austria

<sup>2</sup> Division of Cell Biology, Biocenter, Medical University of Innsbruck, Innrain 80-82, 6020 Innsbruck, Austria

<sup>3</sup> Division of Genetic Epidemiology, Division of Genetic Epidemiology - Faculty of Medicine and Medical Center - University of Freiburg, Hugstetter Strasse 49, 79106 Freiburg, Germany

<sup>4</sup> Division of Human Genetics, Department of Medical Genetics, Molecular and Clinical Pharmacology, Medical University of Innsbruck, Peter-Mayr-Strasse 1, 6020 Innsbruck, Austria

<sup>5</sup> German Center for Diabetes Research (DZD e.V.), Ingolstaedter Landstrasse 1, 85764 Neuherberg, Germany

<sup>6</sup> Institute of Epidemiology II, Helmholtz Zentrum München - German Research Center for Environmental Health, Ingolstaedter Landstrasse 1, 85764 Neuherberg, Germany

<sup>7</sup> Munich Heart Alliance, German Center for Cardiovascular Disease Research, Ingolstaedter Landstrasse 1, 85764 Neuherberg, Germany

<sup>8</sup> Research Unit of Molecular Epidemiology, Helmholtz Zentrum München - German Research Center for Environmental Health, Ingolstaedter Landstrasse 1, 85764 Neuherberg, Germany

<sup>9</sup> Institute of Genetic Epidemiology, Helmholtz Zentrum München - German Research Center for Environmental Health, Ingolstaedter Landstrasse 1, 85764 Neuherberg, Germany

<sup>10</sup> Institute of Medical Informatics, Biometry and Epidemiology, Chair of Genetic Epidemiology, Ludwig-Maximilians-Universität, Marchioninistrasse 15, 81377 Munich, Germany

<sup>11</sup> Internal Medicine I, Medical University Innsbruck, Anichstrasse 35, 6020 Innsbruck, Austria

<sup>12</sup> Section of Interventional Oncology - Microinvasive Therapy (SIP), Department of Radiology, Medical University Innsbruck, Anichstrasse 35, 6020 Innsbruck, Austria

<sup>13</sup> First Department of Internal Medicine, Paracelsus Private Medical University, Müllner Hauptstrasse 48, 5020 Salzburg, Austria

<sup>14</sup> Department of Nephrology and Hypertension, University of Erlangen-Nürnberg, Ulmenweg 18, 91054 Erlangen, Germany

<sup>15</sup> Division of Genomics and RNomics, Biocenter, Medical University of Innsbruck, Innrain 80-82, 6020 Innsbruck, Austria

### Address of correspondence:

Florian Kronenberg, MD, Division of Genetic Epidemiology, Department of Medical Genetics, Molecular and Clinical Pharmacology, Medical University of Innsbruck, Schöpfstr. 41, A-6020 Innsbruck, AUSTRIA; Phone: (+43) 512 9003-70560; E-mail: [Florian.Kronenberg@i-med.ac.at](mailto:Florian.Kronenberg@i-med.ac.at)

## Supplementary Methods

### Study populations

Informed consent was obtained from all participants and study protocols were approved by the respective Institutional Review Boards.

**SAPHIR study<sup>1</sup>:** The Salzburg Atherosclerosis Prevention Program in subjects at High Individual Risk (SAPHIR) is an observational study conducted in the years 1999-2002 involving healthy unrelated subjects: 645 females from 39 to 67 years of age and 1093 males from 39 to 66 years of age. Study participants were recruited by health screening programs in large companies in and around the city of Salzburg as described recently<sup>1</sup>. All individuals were of West-Eurasian origin. Subjects with established coronary artery, cerebrovascular or peripheral arterial disease, congestive heart failure, valvular heart disease, chronic alcohol (more than three drinks a day) or drug abuse, severe obesity (BMI>40kg/m<sup>2</sup>) and pregnant women were excluded. Informed consent was obtained from each participant. At baseline all study participants were subjected to a comprehensive screening examination. A detailed personal and family history was assessed via standardized questionnaires. A physical examination included measurement of anthropometric parameters such as weight, height, waist circumference and percentage body fat. Blood samples were collected after an overnight fasting period. Full Lp(a) phenotyping was available for n=1,522 participants. Details are given in<sup>1</sup>.

**The German Chronic Kidney Disease study (GCKD):** The design and methodology of the GCKD study has previously been reported in detail<sup>2,3</sup>. Briefly, the GCKD study is an ongoing prospective observational national cohort study including 5,217 Caucasian patients with CKD of moderate severity from a broad etiologic spectrum. The study was approved by the institutional ethics committees and subjects gave written informed consent. Patients were included based on a moderately reduced kidney function (estimated GFR (eGFR) 30-60ml/min per 1.73m<sup>2</sup>, corresponding to Kidney Disease Improving Global Outcomes (KDIGO) CKD stage 3) or overt proteinuria in the presence of an eGFR >60ml/min per 1.73m<sup>2</sup>. Serum and urine creatinine was measured using the CREA plus assay and urine albumin using the ALBU-XS assay (both Roche/Hitachi Diagnostics GmbH, Mannheim, Germany). The eGFR was calculated using the CKD-EPI equation<sup>4</sup>. Full Lp(a) phenotyping and genotypes was available for n=4,949 participants.

Prevalence of cardiovascular disease (CVD) (n=987 from 4949  $\cong$  20%) was defined as having had at least one of the following events<sup>5</sup>: history of non-fatal myocardial infarction (n=559), coronary artery bypass grafting (n=329), percutaneous transluminal coronary angioplasty (n=705), stroke

(n=400), and interventions at the carotid arteries (carotid endarterectomy and/or carotid balloon angioplasty or stent implantation; n=114).

**KORA F4:** The KORA cohorts (Cooperative Health Research in the Region of Augsburg, KOoperative Gesundheitsforschung in der Region Augsburg) are several cohorts representative of the general population in Augsburg, Germany and two surrounding counties that were initiated as part of the WHO MONICA Study. Ten years age-sex strata have been sampled from the 25 to 74 year old population with a stratum size of 640 subjects. In the KORA S4 in total 4,261 subjects have been examined (response rate 67%). 3,080 individuals participated in a KORA F4 follow-up examination performed in 2004/2005 that is subject of this investigation. Details are given in<sup>6,7</sup>. Full Lp(a) phenotyping and G4925A genotype was available for n=2,892 participants.

### **Study design for extreme-phenotype discovery phase**

Since the association between LMW apo(a) isoforms and high Lp(a) concentrations is well established, individuals carrying a LMW apo(a) isoform should have rather high Lp(a) values. Therefore, we expected that there might be additional not-yet known genetic variants in those LMW carriers with unexpectedly low Lp(a) values, which shift their Lp(a) levels down. Therefore, in LMW carriers, we have chosen individuals from those within the lowest 20% of Lp(a) levels (extreme phenotype group). Controls were selected from the remaining individuals with LMW apo(a) isoforms.

Likewise, individuals who carry HMW apo(a) isoforms are expected to have rather low Lp(a) values. According to the same rationale as above, we have chosen individuals from the HMW carriers within the individuals with highest 20% of Lp(a) values (extreme phenotype group). The controls were selected from the remaining individuals with HMW apo(a) isoforms.

The other extreme phenotype groups (no isoforms detectable, multiple bands etc., see Table 1) were added to this analysis since we expected an enrichment of mutations in this group.

These extreme phenotype and corresponding control groups were selected from the SAPHIR and GCKD study and serve as a discovery set. The numbers in each group and characteristics can be found in Table 1.

## Lp(a) phenotyping

In brief, Lp(a) concentration was measured by a double-antibody ELISA using an affinity-purified polyclonal apo(a) antibody for coating and a monoclonal antibody 1A2 directed against KIV-2 for detection<sup>8</sup>. Apo(a) isoform phenotyping from plasma was performed by SDS-agarose electrophoresis using 150 ng of Lp(a) protein, followed by Western blot with 1A2 antibody. The isoform nomenclature always refers to the *total* number of all *KIV* (not KIV-2) domains for each allele according to <sup>9</sup> (Supplementary Fig. 2). The number of KIV-2 repeats can be deduced by subtracting 9 from the isoform designation. Total KIV-2 repeat number quantification by qPCR is described below.

## KIV-2 copy determination by qPCR

The sum of KIV-2 repeats present on DNA level was estimated using the exon 4 qPCR protocol of Lanktree et al, 2009<sup>10</sup> with minor modifications (Supplementary Table 16). All measurements were done in quadruplicates in 384 well plates on an ABI 7900HT RT-PCR System (ThermoFisher Scientific, Waltham, MA, USA) using FAM-labeled *LPA* oligonucleotides and RNaseP (TaqMan® Copy Number Reference Assay, ThermoFisher Scientific) as 2n reference. A CV among replicates <2.5 % was required to pass quality control. Average CVs of the Ct values in the discovery set was  $CV_{LPA}=0.6\%$  ( $\pm 0.3$  SD) and  $CV_{2nRef}=0.33\%$  ( $\pm 0.18$  SD).

Data was analyzed using the  $2^{ddCT}$  method<sup>11</sup> and  $2^{ddCT}$  values were converted to KIV-2 copies using a heterozygous calibrator DNA from a healthy, G4925A-negative donor expressing both isoforms in plasma (alleles: 25/30). Importantly, the primers of Lanktree et al. bind only in the KIV-2 repeat and in KIV-1. Therefore the number of targets is lowered by 8 target sites per allele (-8 KIV per allele, i.e. KIV-3 to -10) compared to the Western Blot nomenclature, which reports the number of all KIV<sup>9</sup>. Therefore the  $2^{ddCT}$  values must not be multiplied with the WB result of the calibrator sample but 16 must be subtracted (8 per allele, i.e. KIV-3 to KIV-10). Therefore a number of 39 copies was used for conversion of  $2^{ddCT}$  values to number of copies.

## Batch amplification

The amplicon used for NGS sequencing encompassed 92% of each KIV-2 repeat (about 5,100 bp) and was amplified using an adapted protocol from Noreen et al. with the primers 421U\_2 and 422L11 (an overview is provided in Supplementary Fig. 3).

The PCR protocol and primer sequences are given in Supplementary Tables 3 and 4. PCR products were purified (QIAquick PCR Purification Kit, Qiagen, Hilde, Germany) and quantified (Qubit 3.0 fluorometer and Qubit HS Kit, ThermoFisher Scientific). 200 ng were fragmented to an average fragment length of about 700 bp ( $663\pm 75$  (mean $\pm$ SD)) using NEBNext® dsDNA Fragmentase® (NEB,

Ipswich, MA, USA) (median digestion time 9 min) and subjected to Illumina TruSeq Nano workflow (Illumina, Inc., San Diego, CA, USA). Next Generation Sequencing (NGS) was performed on an Illumina MiSeq system using reagent kit v2 500 cycles.

## NGS data analysis

Data analysis was performed by aligning all reads to one single kringle repeat. For variants occurring only in a subset of KIV-2 repeats, this generates a situation similar to “artificial mitochondrial heteroplasmies”<sup>12</sup> as any variant present only in a subset of KIV-2 repeats will be present only in a subfraction of NGS reads. Alignment and low level variant calling was done using the mtDNA-Server<sup>13</sup> (<https://mtdna-server.uibk.ac.at/>) with slight adaptations. The mtDNA-server pipeline provides highly accurate and specific detection of low level variants by applying several metrics and test statistics to each position. Filters prior to variant calling were a mapping quality score of >20, an alignment score of >30 and a base quality score >20. A minimal coverage of 10X per strand and a minimal amount of 2 reads for both alleles were required. The minor variant allele was required to exceed 1% on one of the two strands. A maximum likelihood model<sup>14</sup> taking sequencing errors into account as well as a strand bias model was applied to reduce false-positives as previously described<sup>13</sup>.

The sixth KIV-2 repeat in the human genome reference hg19 as defined by the binding sites of the primers 421U\_2 and 422L (Supplementary Table 4) was used as reference sequence (chr6:161,033,785-161,038,888), since this is the longest KIV-2 repeat in hg19. This reduces the need of insertion calling, which is still difficult using NGS data<sup>15</sup>. Accordingly the non-standard annotation “G4925A” relates to the variant position within this PCR product. To allow context sequence determination, we provide arbitrary HGVS annotation of this variant to the first KIV-2 repeat of the human reference genome as NM\_005577.2:c.853G>A.

The LPA specific KIV-2 low level variant calling pipeline will be available at <https://lpa-server.i-med.ac.at> (manuscript in preparation).

## 1000G and Genome Austria data analysis

For the exome sequencing data only samples with >1000X total coverage on the variant positions were analyzed (n=1,589). The mean coverage on the variant position in the high coverage whole genome data was to 555X±154. Thirty high coverage whole genome and 2,535 whole exome data from the 1000 Genome project<sup>16</sup> were downloaded from the NCBI FTP Site (<ftp://ftp-trace.ncbi.nih.gov/1000genomes/ftp>) and all reads mapping to KIV-2 extracted by Samtools<sup>17</sup> with the coordinates on chr6:161,033,785-161,066,618 (hg19).

Additionally, 8 high coverage (average: 514X±199 at variant position) whole genome sequences from GenomeAustria were downloaded (<http://genomaustria.at/unser-genom/> and [www.personalgenomes.org/austria](http://www.personalgenomes.org/austria)) and processed accordingly. Results are provided in Supplementary Tables 8, 9, 10, 11).

## **castPCR**

In brief, a castPCR assay is an allele-specific qPCR assay consisting of two allele-specific reactions (wild type detection assay and mutation detection assay), which are run in parallel on each sample using the same DNA input amount. Both assays contain a common locus-specific Taqman probe and a common reverse primer. An allele-specific primer located on the variant position provides allele specificity. The other allele is blocked by a competing blocking oligo to avoid unspecific amplification. This provides thermodynamic advantage to the probe perfectly matching the target allele and allows detection of somatic mutations down to at least 0.1% level<sup>18</sup>. Assay was validated by independently typing the NGS-sequenced discovery set.

## **Procedure**

Reactions were performed in a 384 well plate system on a QuantStudio™ 6 Flex Real-Time PCR System (ThermoFisher Scientific) using 2 ng genomic DNA as input. To control for PCR failure or false-negative non-template controls, a commercial Internal Process Control reagent (TaqMan® Mutation Detection IPC Reagent Kit, ThermoFisher Scientific) was included in 22 samples and two non-template controls for each master mix. Cycling was performed according to manufacturer instructions.

Data was analyzed using the MutationDetector™ software (ThermoFisher Scientific) according to manufacturer guidelines and using a conservative deltaCt cut-off of 9.0 (corresponding to a sensitivity of 0.2%) to reduce the likelihood of any variants just marginally passing the threshold due to random noise. Assay was validated by genotyping the whole discovery set. Classification performance figures from assay validation are reported in Supplementary Table 12.

### Sequence used for design of G4925A castPCR assay

“N” represents bases marked to be avoided in assay design because variants were observed at these positions in ultra-deep NGS. G4925A is highlighted in red.

>422\_G4925A\_SSSNP

```
GGCACCGTAATGACCTTGTTCAGCACAAAGGAGAGAGTGTGGGGTGCCCCTGCATGTTGTCCCACCTCTTG
TGACGTGTATCGTTTTGGAATTTCCAGTGGCTTGATCATGAACTACTGCAGGAATCCAGATGCTGTGGCAGCTC
CTTATTGTTATACGAGGGATCCCGGTGTCAGGTGGGAGTACTGCAACCTGACGCAATGCTCAGACGCAGAAG
GGACTGCCGTCGCGCCTCCGACTGTTACCCCGGTTCCAAGCCTAGAGGCTCCTTCCGAACAA[G/A]GTAAGGA
GTCTGTGGCCAGACATCTACACGCTTCGATGCTGGNATGAAAAGCCATGGAAATTCCTACTGATGCAGCCGCC
TTCAATGGTAAACGGATGCTCGAGTGTGCCNGAGTTCTANCATGTNGGNGGAAGCCTCCGTGNACTCTCTG
GGGAGCCAGCGGAGTGATTTCTGGTGCAACGTGGTTGGGCTTTGTCTTTAGGATGGGCACAAACCCTCCAG
GGGGATCGACTTCAAATTCACCTTGTGTAAAACGGGCTACCTCAGTGTCCCAG
```

### castPCR quality control

To exclude mistyping we applied extensive quality control measures as follows:

**(1)** Prior to population screening, the assay was validated on all samples (n=123) from the discovery set, showing excellent classification performance (Supplementary Table 12).

**(2)** Reproducibility was assessed by typing duplicates of 22 discovery samples. Only one duplicate was discordant giving one false-positive call. Inspection of raw data revealed a considerable higher dCt value between mutation and wild type target compared to the true positive (8.53 vs. 6.66 (average)  $\pm 0.79$  SD of true positives). The sample had passed the cut-off value by only 0.43 Ct and was >2 SD apart from the other samples. This can occur due to a) unspecific amplification slightly passing the cutoff or b) template amount lower by  $2^{\Delta dCt}$  fold, i.e.  $2^{1.87} = 3.86$  fold. The latter would reflect also in the Ct value of the wild type assay since the mutation level reported by NGS indicates that only approximately 1 or two KIV-2 are affected by the mutation and thus every sample does contain most KIV-2 as wild type sequence. No shift in the Ct value of the wild type assay was observed (Ct wt assay = 21.91 vs. average 21.67  $\pm 1.01$  SD). Thus the positive signal was likely a false-positive amplification slightly passing the threshold. Accordingly a repeated measurement of the discordant sample gave the expected negative call. Based on this observation all positive signals were controlled for dCt values being >2 SD from the average dCt of all positive samples and raw data of such samples was manually reviewed.

**(3)** A positive and a negative control sample (G4925A carrier status determined by NGS) was included on each 384 well plate (n=16). All the 16 repeated measurement were concordant. CV of the Ct values of wildtype and mutant target was only 0.97% and 1.18%, showing excellent pipetting accuracy and reproducibility of the high throughput setup and assay chemistry.

**(4)** In KORAF4 n=216 samples (7.1%) were genotyped in duplicates for quality control. Discordance rate was 0.64% (n=2 samples).

**(5)** Overall call rate, defined as positive wild type assay amplification, was 98.9%.

### **Pulsed field gel electrophoresis (PFGE)**

PFGE was performed as described previously<sup>19</sup> using a using a Bio-Rad CHEF Mapper Pulsed Field Electrophoresis System. Allele sizes were determined using Lambda PFGE Ladder (NEB). Allele separation and isolation was carried out as described<sup>19</sup>.

Separated alleles were then tested by castPCR to determine whether G4925A is truly located on the short allele. Moreover, comparison of PFGE results on genomic DNA and Western blot results on plasma allows determining whether G4925A causes a truncated protein. By deleting KIV-3 to -10, the KV and the final protease domain (Fig. 1) a truncation within KIV-2 would cause a protein smaller by the equivalent of at least 11 KIV, if the truncation occurs in the last KIV-2 repeat (approximation without taking glycosylation into account).

### **pSPL3 minigene generation**

A PCR fragment spanning the short intron between two KIV-2 repeats as well as the two boundary exons (with up and downstream intronic portions; Supplementary Fig. 3) was subcloned into a pCR-XL-TOPO vector using the TOPO<sup>®</sup> XL PCR Cloning Kit (ThermoFisher Scientific) in NEB Turbo E. coli chemically competent cells. G4925A mutation was introduced by site-directed PCR mutagenesis using the Pfu-Ultra II Fusion HS DNA polymerase (Agilent Technologies, Inc., Santa Clara, CA, USA) and DpnI digestion (8 u; QuikChange II Site-Directed Mutagenesis Kit, Agilent Technologies) in 40 µl PCR reaction (37°C, 1 h). Positive clones were identified by colony PCR and confirmed by Sanger sequencing.

Insert was amplified from pXL-TOPO-XL plasmids using NotI-HF (NEB) and BglII (NEB)-tagged primer and sequential digestion (both NEB). 1 µg vector was digested using NotI-HF and BamHI-HF (NEB), dephosphorylated by USB rSAP (USB, Affymetrix, Santa Clara, CA, USA), ligated by T4 ligase (NEB) and transformed into NEB Turbo E. coli. To properly test for induced non-sense mediated



mRNA decay, reading frame was adjusted to in-frame by insertion of two bases at position 9 and 10 of LPA exon 2 using site directed mutagenesis. Due to the large plasmid and insert size (6031 bp and 2645 bp), a multiple cloning site-depleted pEGFP-C1 eGFP cassette was inserted into pSPL3 for transfection control. Multiple cloning site was deleted as described in <sup>20</sup> (Supplementary Table 6 and 17). pSPL3 vector was opened by HpaI digestion, dephosphorylated by rSAP and ligated with PCR-amplified and T4PNK-phosphorylated eGFP cassette. Expression was driven by SV40 promoter for the minigene and by CMV for the eGFP cassette.

PCR protocols and primer sequences are given in Supplementary Tables 5 and 6.

### **Minigene assays**

Supplementary Fig. 8 gives an explanation of the minigene assay. Constructs were transfected in HepG2 human hepatoblastoma cells purchased from the American Type Culture Collection, Manassas, VA (ATCC\_HB-8065). The original cells were subcloned and selected for hepatocyte-like morphology by the formation of bile-canaliculi. The derived cell clone has been routinely tested for mycoplasma contamination. Minigene expression was driven by SV40 promoter (CMV for the eGFP cassette). Parallel incubation with and without Puromycin was used to assess occurrence of nonsense-mediated mRNA decay<sup>21</sup> (10 µg/mL final concentration). Cells were cultivated in DMEM high glucose supplemented 2 mM L-glutamine (Sigma-Aldrich, St. Louis, MO, USA), 10% fetal calf serum and 1% final concentration PenStrep (100 u/mL penicillin and 0.1 mg/mL Streptomycin; Sigma-Aldrich) at 37°C in a 5% CO<sub>2</sub> atmosphere. 24 hours prior to transfection, cells were seeded into 6-well plates at 4 x 10<sup>5</sup> cells/well. Transfection was carried out in two technical and two biological replicates using 2.5 µg plasmid DNA and Lipofectamine<sup>®</sup> LTX Plus (Thermo Fisher Scientific) according to manufacturer protocol. The newly introduced eGFP cassette served for transfection control purposes.

Puromycin was added 5 hours before harvesting, were applicable. Total RNA was isolated 48 h after transfection using RNAzol (Sigma-Aldrich) and 1 µg were reverse transcribed using AMV Reverse Transcriptase and oligo-dT primer (Promega). Splicing patterns were assessed by PCR using primer binding in the constitutive exons flanking the insert (Supplementary Fig. 8, Supplementary Table 5 and 6). PCR products were finally isolated from agarose gel using Wizard<sup>®</sup> SV Gel and PCR Clean-Up System (Promega) and analyzed by Sanger sequencing.

## RT-PCRs and castPCR on liver biopsy mRNA

Liver biopsies were obtained from four patients undergoing stereotaxic radiofrequency ablation of hepatocellular carcinoma at the Department of Radiology of the Medical University of Innsbruck (1 G4925A carrier). Computed tomography guidance was used to place the biopsy needle in non-tumorous liver tissue. Informed consent was obtained from all participants and study protocol was approved by the Institutional Review Board of the Medical University of Innsbruck. Tissue was immediately frozen in liquid nitrogen, mRNA was isolated using Rneasy Plus Micro Kit and reverse transcribed using ThermoFisher Maxima H Minus First Strand cDNA Synthesis Kit with dsDNase treatment and random hexamer primers. G4925A carrier status was determined by castPCR in gDNA isolated from whole blood. Two batch RT-PCR products were designed to screen for exon skipping and for detection of adenosines at the splice site by NGS in mature mRNA (Supplementary Tables 18 and 19; Supplementary Fig. 10). NGS was performed as above. RNA secondary structure modeling was performed using mFold<sup>22</sup> (<http://unafold.rna.albany.edu/?q=mfold/RNA-Folding-Form>) with standard settings.

Amplicons of the G4925A context sequence from pre-mRNA were amplified as given in Supplementary Tables 18-19, quantified by Qubit fluorometer, normalized to 2 ng/ $\mu$ l and diluted 1:50,000 and 1:500,000 to ensure amplification of the castPCR wild type probe within the optimal Ct range as specified by the assay manufacturer. CastPCR results from both dilutions corresponded. Presence of genomic DNA in the pre-mRNA PCR was excluded by amplification of an amplicon spanning over intron 6 of *GAPDH* from the same RNA extracts. Only *GAPDH* amplicons corresponding to spliced product were observed (113 bp instead of 205 bp expected on gDNA; Supplementary Fig. 14), confirming efficient removal of genomic DNA by dsDNase treatment.

## Statistical Methods

Prevalence of G4925A in the discovery set phenotypic groups was compared by Fisher exact test (two-sided) and relative contribution of the smaller band in the Western blot to the total signal in Western blot was compared by Wilcoxon test.

The association of G4925A with Lp(a) was tested in the entire KORA F4 study and in LMW/HMW subgroups by linear regression analysis. Since the distribution of Lp(a) concentrations is highly skewed, Lp(a) concentrations were inverse normal-transformed to enforce a normal distribution. Linear regression on the original scale of Lp(a) was additionally used to get a sense of the effect size. All regression analyses were additionally adjusted for the smaller apo(a) isoform (which commonly determines Lp(a) level and CVD risk<sup>23</sup>), respectively the only isoform present. LMW status was

defined according to previous work<sup>24</sup> (at least one isoform <23 KIV repeats). The phenotypic variance of inverse normally transformed Lp(a) explained by G4925A was obtained from the regression models, either from the variant alone and also in addition to a model, which already contained the (smaller or only) isoform. In both studies, KORA F4 and GCKD, regression analysis on Lp(a) was also performed for the SNP rs75692336, which tags G4925A (see paragraph “Detection of tagging SNP for G4925A in the non-repetitive portion of LPA” in Supplementary Methods). The SNP was coded dominantly and regression analyses were performed as described above for G4925A. Finally, effects of G4925A on CVD prevalence in the GCKD study were tested by a logistic regression. Since the information on the carrier status of G4925A was not available for the complete study, the tagging SNP rs75692336 was used as a proxy to assess whether G4925A confers CVD risk reduction induced to LMW carriers compared to HMW carriers. This logistic regression model was performed using the whole GCKD study group and also stratified by the carrier status for at least one rare allele of rs75692336. In addition, adjusted models were performed, taking into account gender, age, Type 2 Diabetes, LDL cholesterol, triglycerides (which was log-transformed), and the kidney function parameters eGFR and albumin-creatinine-ratio (UACR), which was log-transformed. Since about half of the patients in the GCKD study group take lipid-lowering medications, LDL cholesterol was corrected accordingly for those individuals taking lipid-lowering medication by dividing LDL cholesterol by 0.7 to approximate pre-medication LDL levels. Furthermore, each common cholesterol measurement method implicitly also measures a part of Lp(a)<sup>25</sup>. Therefore, LDL cholesterol values, that were partly already corrected for medication were additionally corrected for Lp(a) by subtracting  $0.3 * Lp(a)$ .

### **Detection of tagging SNP for G4925A in the non-repetitive portion of LPA**

A direct evaluation of the effect of G4925A on CVD is hampered by the fact that variants in the KIV-2 are not contained in imputed whole-genome SNP datasets, commonly available in large, genetic-epidemiological studies on cardiovascular diseases. However, both 1000G-imputed whole-genome SNP data (Affymetrix Axiom)<sup>7,26</sup> and G4925A carrier status was available in KORA F4, allowing searching for proxies of G4925A among the SNP presented in the imputed data set.

Genome-wide genotype data have been imputed with the software IMPUTE using 1000 Genomes phase 1, version 3<sup>27</sup>. All SNPs having a minor allele frequency of >1%, a imputation quality of  $\geq 0.4$  (IMPUTE info) and a p-value of the HWE-test  $\geq 1e-06$  were included individually in a linear

regression model on inverse normal transformed Lp(a), additionally adjusted for isoforms. 932 SNPs showed a genome-wide significant p-value ( $<5e-08$ ). Each of these SNPs was analyzed for its association with G4925A using Pearson correlation coefficient. The maximum  $r^2$  was found to be 0.82. rs75692336 was selected as tagging SNP for G4925A ( $r^2=0.82$ ,  $D'=0.99$ , minor allele frequency MAF=13%, imputation quality info=0.985). In subsequent association analysis of this SNP with Lp(a) concentrations, rs75692336 was coded dominantly, since heterozygous and homozygous G4925A carrier status cannot be discerned by castPCR.

The association of rs75692336 with CVD events was evaluated in the GCKD study. In this study, genome-wide genotyping data was performed by Illumina HumanOmni2.5-8Exome v1.0 microarrays, which were imputed using the 1000 Genomes phase 3 reference panel in the software Minimac3<sup>28</sup>. rs75692336 was derived from these imputed genotype data (MAF=0.13; imputation quality  $r^2=0.998$ ) and coded dominantly.

## Supplementary Tables

**Supplementary Table S1: Baseline characteristics of contributing studies**

|                                         | <b>KORA F4<br/>(n=2,892)</b>      | <b>GCKD<br/>(n=4,949)</b>              | <b>SAPHIR<br/>(n=1,522)</b>       |
|-----------------------------------------|-----------------------------------|----------------------------------------|-----------------------------------|
| Age (in years)                          | 56.2 ± 13.3<br>[44, 56, 67]       | 60.1 ± 12.0<br>[53, 63, 70]            | 51 ± 6.0<br>[46, 52, 55]          |
| Women, n (%)                            | 1490 (51.5%)                      | 1969 (39.8%)                           | 490 (32.7%)                       |
| Lp(a) (mg/dL), all subjects             | 21.8 ± 24.7<br>[5.2, 11.7, 30.6]  | 24.6 ± 30.5<br>[5.0, 11.5, 33.5]       | 24.0 ± 27.4<br>[5.4, 11.6, 36.3]  |
| Lp(a) (mg/dL), LMW isoforms             | 47.7 ± 31.1<br>[22.6, 46.7, 66.2] | 56.3 ± 40.1<br>[25.6, 53.3, 77.6]      | 48.6 ± 35.3<br>[13.1, 46.4, 68.9] |
| Lp(a) (mg/dL), HMW isoforms             | 13.3 ± 14.1<br>[4.1, 8.7, 17.1]   | 14.2 ± 16.4<br>[3.8, 8.5, 17.7]        | 13.9 ± 14.1<br>[4.3, 8.7, 19.1]   |
| LMW isoforms, n (%)                     | 716 (24.8%)                       | 1223 (24.7%)                           | 440 (29.0%)                       |
| Short Isoform according to Western blot | 26.8 ± 6.0<br>[23, 26, 31]        | 27.1 ± 6.0<br>[23, 27, 31]             | 26.9 ± 6.2<br>[22, 26, 31]        |
| LDL cholesterol (mg/dL)                 | 136.2 ± 34.9<br>[112, 134, 158]   | 118.4 ± 44.0<br>[89.2, 113.8, 142.7]   | 145.0 ± 35.6<br>[120, 144, 168]   |
| HDL cholesterol (mg/dL)                 | 55.9 ± 14.5<br>[45, 54, 65]       | 52.0 ± 18.1<br>[39.4, 48.4, 61.4]      | 59.1 ± 15.5<br>[48, 57, 68]       |
| Total cholesterol (mg/dL)               | 216.2 ± 39.7<br>[188, 214, 240]   | 211.2 ± 52.9<br>[176.4, 207.1, 239.4]  | 226.5 ± 38.8<br>[199, 224, 251]   |
| Triglycerides (mg/dL)                   | 125.1 ± 89.1<br>[72, 105, 151]    | 198.1 ± 126.1<br>[118.0, 168.2, 239.0] | 126.0 ± 89.3<br>[72, 101, 151]    |
| Lipid-lowering medication, n (%)        | 367 (12.7%)                       | 2520 (50.9%)                           | 63 (4.2%)                         |
| Type 2 Diabetes, n (%)                  | 209 (7.1%)                        | 1739 (35.1%)                           | 48 (3.2%)                         |
| eGFR (mL/min/1.73m <sup>2</sup> )       | --                                | 49.4 ± 18.1<br>[37, 46, 57]            | --                                |
| UACR (mg/g)                             | --                                | 431.4 ± 960.4<br>[9.6, 50.9, 391.6]    | --                                |

Continuous variables are shown as mean ± SD and [25%,50%,75%] percentiles

n: Sample size of analysis dataset with available Lp(a)-values (and genotypes in KORA F4 and GCKD)

**Supplementary Table S2: Description of discovery samples.**

Column G4925A reports the mutation level according to deep sequencing. Minor allele carriers for the known null mutations are boldfaced.

| #                                                                                | Lp(a)<br>[mg/dL] | Isoform<br>1 | Isoform<br>2 | Sum<br>Western<br>blot | rs41272114<br>(null allele<br>KIV-8) <sup>29,30</sup> | rs143431368<br>(null allele<br>KIV-10) <sup>29</sup> | qPCR<br>[Sum<br>copies] | G4925A      |
|----------------------------------------------------------------------------------|------------------|--------------|--------------|------------------------|-------------------------------------------------------|------------------------------------------------------|-------------------------|-------------|
| <b>GCKD study – Controls with HMW isoforms and expected Lp(a) concentrations</b> |                  |              |              |                        |                                                       |                                                      |                         |             |
| 1                                                                                | 6.2              | 37           | -            | 37                     | CT                                                    | AA                                                   | 54                      |             |
| 2                                                                                | 4.7              | 25           | -            | 25                     | CC                                                    | AA                                                   | 35                      | <b>2.9%</b> |
| 3                                                                                | 11.9             | 26           | 38           | 64                     | CC                                                    | AA                                                   | 47                      |             |
| 4                                                                                | 7.2              | 37           | 38           | 75                     | CC                                                    | AA                                                   | 57                      |             |
| 5                                                                                | 10.1             | 34           | 36           | 70                     | CC                                                    | AA                                                   | 48                      |             |
| 6                                                                                | 5.9              | 36           | -            | 36                     | CC                                                    | AA                                                   | 46                      |             |
| 7                                                                                | 6.5              | 37           | -            | 37                     | CC                                                    | AA                                                   | 60                      |             |
| 8                                                                                | 9.8              | 34           | -            | 34                     | CC                                                    | AA                                                   | 42                      |             |
| 9                                                                                | 0.2              | 34           | 37           | 71                     | CC                                                    | AA                                                   | 48                      |             |
| 10                                                                               | 0.8              | 39           | -            | 39                     | CC                                                    | AA                                                   | 47                      |             |
| 11                                                                               | 1.0              | 36           | -            | 36                     | CC                                                    | AA                                                   | 64                      |             |
| 12                                                                               | 1.3              | 28           | 38           | 66                     | CC                                                    | AA                                                   | 53                      |             |
| 13                                                                               | 1.3              | 27           | -            | 27                     | CC                                                    | AA                                                   | 50                      |             |
| <b>GCKD study – Controls with LMW isoforms and expected Lp(a) concentrations</b> |                  |              |              |                        |                                                       |                                                      |                         |             |
| 14                                                                               | 58.8             | 14           | -            | 14                     | CC                                                    | AA                                                   | 23                      |             |
| 15                                                                               | 30.1             | 20           | 31           | 51                     | CC                                                    | AA                                                   | 39                      |             |
| 16                                                                               | 52.9             | 20           | -            | 20                     | CC                                                    | AA                                                   | 35                      |             |
| 17                                                                               | 35.0             | 20           | 32           | 52                     | CC                                                    | AA                                                   | 36                      |             |
| 18                                                                               | 52.3             | 16           | -            | 16                     | CC                                                    | AA                                                   | 44                      |             |
| 19                                                                               | 55.0             | 20           | -            | 20                     | CC                                                    | AA                                                   | 36                      |             |
| 20                                                                               | 55.7             | 19           | 37           | 56                     | CC                                                    | AA                                                   | 37                      |             |
| <b>GCKD study – Extreme phenotype approach: high Lp(a) despite HMW isoform</b>   |                  |              |              |                        |                                                       |                                                      |                         |             |
| 21                                                                               | 76.1             | 29           | 34           | 63                     | CC                                                    | AA                                                   | 42                      |             |
| 22                                                                               | 66.0             | 31           | 37           | 68                     | CC                                                    | AA                                                   | 54                      |             |
| 23                                                                               | 65.4             | 32           | 36           | 68                     | CC                                                    | AA                                                   | 54                      |             |
| 24                                                                               | 66.3             | 25           | 29           | 54                     | CC                                                    | AA                                                   | 44                      |             |
| 25                                                                               | 71.9             | 27           | 39           | 66                     | CC                                                    | AA                                                   | 56                      |             |
| 26                                                                               | 81.6             | 28           | 33           | 61                     | CC                                                    | AA                                                   | 39                      |             |
| 27                                                                               | 98.4             | 29           | -            | 29                     | CC                                                    | AA                                                   | 43                      |             |
| 28                                                                               | 129.7            | 26           | 34           | 60                     | CC                                                    | AA                                                   | 37                      |             |
| 29                                                                               | 76.7             | 30           | 37           | 67                     | CC                                                    | AA                                                   | 51                      |             |
| 30                                                                               | 81.2             | 34           | -            | 34                     | CC                                                    | AA                                                   | 51                      |             |
| 31                                                                               | 68.9             | 25           | 27           | 52                     | CC                                                    | AA                                                   | 40                      |             |
| 32                                                                               | 77.8             | 29           | -            | 29                     | CC                                                    | AA                                                   | 40                      |             |
| 33                                                                               | 78.5             | 25           | -            | 25                     | CC                                                    | AA                                                   | 40                      |             |
| 34                                                                               | 73.9             | 29           | -            | 29                     | CC                                                    | AA                                                   | 42                      |             |
| 35                                                                               | 68.6             | 28           | 35           | 63                     | CC                                                    | AA                                                   | 45                      |             |

... to be continued

Supplementary Table S2: continued

| #                                                                                      | Lp(a)<br>[mg/dL] | Isoform<br>1 | Isoform<br>2 | Sum<br>Western<br>blot | rs41272114<br>(null allele<br>KIV-8) <sup>29,30</sup> | rs143431368<br>(null allele<br>KIV-10) <sup>29</sup> | qPCR<br>[Sum<br>copies] | G4925A |
|----------------------------------------------------------------------------------------|------------------|--------------|--------------|------------------------|-------------------------------------------------------|------------------------------------------------------|-------------------------|--------|
| <b>GCKD study – Extreme phenotype approach: low Lp(a) despite LMW isoform</b>          |                  |              |              |                        |                                                       |                                                      |                         |        |
| 36                                                                                     | 3.6              | 20           | 31           | 51                     | CC                                                    | AA                                                   | 41                      | 6.1%   |
| 37                                                                                     | 2.2              | 20           | -            | 20                     | CT                                                    | AA                                                   | 44                      | 6.4%   |
| 38                                                                                     | 4.0              | 16           | 27           | 43                     | CC                                                    | AA                                                   | 34                      | 7.4%   |
| 39                                                                                     | 8.2              | 21           | 32           | 53                     | CC                                                    | AA                                                   | 44                      | 3.0%   |
| 40                                                                                     | 2.0              | 37           | -            | 37                     | CC                                                    | AA                                                   | 64                      | -      |
| 41                                                                                     | 6.7              | 21           | 37           | 58                     | CC                                                    | AA                                                   | 40                      | 2.7%   |
| 42                                                                                     | 2.5              | 20           | -            | 20                     | CC                                                    | AA                                                   | 40                      | 5.3%   |
| 43                                                                                     | 2.5              | 22           | 29           | 51                     | CC                                                    | AA                                                   | 35                      | 2.9%   |
| 44                                                                                     | 8.8              | 14           | 34           | 48                     | CC                                                    | AA                                                   | 35                      | 7.0%   |
| 45                                                                                     | 4.9              | 20           | 37           | 57                     | CC                                                    | AA                                                   | 45                      | 5.4%   |
| 46                                                                                     | 4.6              | 20           | 31           | 51                     | CC                                                    | AA                                                   | 36                      | 6.3%   |
| 47                                                                                     | 4.2              | 17           | 31           | 48                     | CC                                                    | AA                                                   | 34                      | 6.1%   |
| 48                                                                                     | 3.9              | 22           | 37           | 59                     | CC                                                    | AA                                                   | 36                      | -      |
| 49                                                                                     | 2.7              | 28           | -            | 28                     | CC                                                    | AA                                                   | 49                      | -      |
| 50                                                                                     | 3.2              | 20           | -            | 20                     | CC                                                    | AA                                                   | 45                      | 5.5%   |
| 51                                                                                     | 8.8              | 19           | -            | 19                     | CT                                                    | AA                                                   | 36                      | 3.2%   |
| 52                                                                                     | 7.9              | 19           | 37           | 56                     | CC                                                    | AA                                                   | 38                      | 5.2%   |
| 53                                                                                     | 6.3              | 20           | 25           | 45                     | CC                                                    | AA                                                   | 37                      | 7.4%   |
| <b>GCKD study – Extreme phenotype approach: no isoform detectable in Western blot</b>  |                  |              |              |                        |                                                       |                                                      |                         |        |
| 54                                                                                     | 0.8              | -            | -            | -                      | CC                                                    | AA                                                   | 56                      | -      |
| 55                                                                                     | 0.6              | -            | -            | -                      | CT                                                    | AA                                                   | 51                      | -      |
| 56                                                                                     | 0.2              | -            | -            | -                      | CC                                                    | AA                                                   | 58                      | -      |
| 57                                                                                     | 0.1              | -            | -            | -                      | TT                                                    | AA                                                   | 46                      | -      |
| <b>GCKD study – Extreme phenotype approach: other (only 10% of small allele)</b>       |                  |              |              |                        |                                                       |                                                      |                         |        |
| 58                                                                                     | 35.8             | 20           | 28           | 48                     | CC                                                    | AA                                                   | 37                      | 6.4%   |
| <b>GCKD study – Extreme phenotype approach: other (multiple bands in Western blot)</b> |                  |              |              |                        |                                                       |                                                      |                         |        |
| 59                                                                                     | 85.8             | 18           | 23           | 41                     | CC                                                    | AA                                                   | 32                      | 3.3%   |

... to be continued

Supplementary Table S2: continued

| #                                                                                  | Lp(a)<br>[mg/dL] | Isoform<br>1 | Isoform<br>2 | Sum<br>Western<br>blot | rs41272114<br>(null allele<br>KIV-8) <sup>29,30</sup> | rs143431368<br>(null allele<br>KIV-10) <sup>29</sup> | qPCR<br>[Sum<br>copies] | G4925A      |
|------------------------------------------------------------------------------------|------------------|--------------|--------------|------------------------|-------------------------------------------------------|------------------------------------------------------|-------------------------|-------------|
| <b>SAPHIR study – Controls with HMW isoforms and expected Lp(a) concentrations</b> |                  |              |              |                        |                                                       |                                                      |                         |             |
| 1                                                                                  | 5.3              | 35           | -            | -                      | CC                                                    | AA                                                   | 49                      | -           |
| 2                                                                                  | 1.8              | 30           | 36           | 66                     | CC                                                    | AA                                                   | 51                      | -           |
| 3                                                                                  | 3.4              | 30           | 36           | 66                     | CC                                                    | AA                                                   | 43                      | -           |
| 4                                                                                  | 1.3              | 35           | -            | -                      | <b>CT</b>                                             | AA                                                   | 37                      | -           |
| 5                                                                                  | 4.3              | 35           | -            | -                      | CC                                                    | <b>AG</b>                                            | 47                      | -           |
| 6                                                                                  | 3.7              | 26           | -            | -                      | CC                                                    | AA                                                   | 40                      | -           |
| 7                                                                                  | 2.9              | 32           | -            | -                      | CC                                                    | AA                                                   | 46                      | -           |
| 8                                                                                  | 1.4              | 32           | -            | -                      | CC                                                    | AA                                                   | 44                      | <b>4.6%</b> |
| 9                                                                                  | 2.1              | 31           | -            | -                      | CC                                                    | AA                                                   | 49                      | -           |
| 10                                                                                 | 1.4              | 36           | -            | -                      | CC                                                    | AA                                                   | 42                      | -           |
| 11                                                                                 | 3.4              | 36           | -            | -                      | CC                                                    | AA                                                   | 50                      | <b>4.3%</b> |
| 12                                                                                 | 3.3              | 25           | -            | -                      | <b>CT</b>                                             | AA                                                   | 38                      | <b>3.0%</b> |
| 13                                                                                 | 2.5              | 30           | -            | -                      | CC                                                    | AA                                                   | 45                      | -           |
| 14                                                                                 | 2.3              | 30           | -            | -                      | CC                                                    | <b>AG</b>                                            | 44                      | -           |
| 15                                                                                 | 2.0              | 30           | -            | -                      | CC                                                    | AA                                                   | 38                      | -           |
| <b>SAPHIR study – Controls with LMW isoforms and expected Lp(a) concentrations</b> |                  |              |              |                        |                                                       |                                                      |                         |             |
| 16                                                                                 | 140.3            | 15           | -            | -                      | CC                                                    | AA                                                   | 31                      | -           |
| 17                                                                                 | 51.2             | 15           | -            | -                      | CC                                                    | AA                                                   | 32                      | -           |
| 18                                                                                 | 88.9             | 15           | -            | -                      | CC                                                    | AA                                                   | 23                      | -           |
| 19                                                                                 | 96.9             | 14           | -            | -                      | CC                                                    | AA                                                   | 31                      | -           |
| 20                                                                                 | 77.1             | 15           | -            | -                      | CC                                                    | AA                                                   | 30                      | -           |
| 21                                                                                 | 40.3             | 15           | -            | -                      | CC                                                    | AA                                                   | 30                      | -           |
| 22                                                                                 | 69.2             | 15           | -            | -                      | CC                                                    | AA                                                   | 26                      | <b>4.6%</b> |
| 23                                                                                 | 162.5            | 15           | -            | -                      | CC                                                    | AA                                                   | 35                      | -           |
| <b>SAPHIR study – Extreme phenotype approach: high Lp(a) despite HMW isoform</b>   |                  |              |              |                        |                                                       |                                                      |                         |             |
| 24                                                                                 | 38.5             | 40           | -            | -                      | CC                                                    | AA                                                   | 53                      | -           |
| 25                                                                                 | 55.4             | 30           | -            | -                      | <b>CT</b>                                             | AA                                                   | 45                      | -           |
| 26                                                                                 | 21.9             | 36           | -            | -                      | CC                                                    | AA                                                   | 52                      | -           |
| 27                                                                                 | 59.6             | 33           | -            | -                      | CC                                                    | AA                                                   | 42                      | -           |
| 28                                                                                 | 60.0             | 29           | 33           | 62                     | CC                                                    | AA                                                   | 42                      | -           |
| 29                                                                                 | 72.7             | 30           | 39           | 69                     | CC                                                    | AA                                                   | 47                      | -           |
| 30                                                                                 | 55.4             | 31           | 33           | 64                     | CC                                                    | AA                                                   | 39                      | -           |
| 31                                                                                 | 54.0             | 34           | -            | -                      | CC                                                    | AA                                                   | 47                      | -           |
| 32                                                                                 | 55.9             | 30           | 35           | 65                     | CC                                                    | AA                                                   | 44                      | -           |
| 33                                                                                 | 62.0             | 29           | -            | -                      | CC                                                    | AA                                                   | 38                      | <b>4.0%</b> |
| 34                                                                                 | 50.8             | 34           | 39           | 73                     | CC                                                    | AA                                                   | 47                      | -           |
| 35                                                                                 | 64.5             | 30           | -            | -                      | CC                                                    | AA                                                   | 42                      | -           |
| 36                                                                                 | 25.8             | 36           | -            | -                      | CC                                                    | AA                                                   | 51                      | -           |
| 37                                                                                 | 66.5             | 29           | -            | -                      | CC                                                    | AA                                                   | 43                      | -           |
| 38                                                                                 | 51.6             | 33           | -            | -                      | CC                                                    | AA                                                   | 37                      | -           |
| 39                                                                                 | 64.2             | 30           | 36           | 66                     | CC                                                    | AA                                                   | 38                      | -           |
| 40                                                                                 | 69.4             | 29           | 34           | 63                     | CC                                                    | AA                                                   | 41                      | -           |
| 41                                                                                 | 49.6             | 33           | 36           | 69                     | CC                                                    | AA                                                   | 43                      | -           |

... to be continued



Supplementary Table S2: continued

| #                                                                                       | Lp(a)<br>[mg/dL] | Isoform<br>1 | Isoform<br>2 | Sum<br>Western<br>blot | rs41272114<br>(null allele<br>KIV-8) <sup>29,30</sup> | rs143431368<br>(null allele<br>KIV-10) <sup>29</sup> | qPCR<br>[Sum<br>copies] | G4925A      |
|-----------------------------------------------------------------------------------------|------------------|--------------|--------------|------------------------|-------------------------------------------------------|------------------------------------------------------|-------------------------|-------------|
| <b>SAPHIR study – Extreme phenotype approach: low Lp(a) despite LMW isoform</b>         |                  |              |              |                        |                                                       |                                                      |                         |             |
| 42                                                                                      | 1.9              | 12           | 20           | 32                     | CC                                                    | AA                                                   | 41                      | -           |
| 43                                                                                      | 6.4              | 21           | -            | -                      | CC                                                    | AA                                                   | 37                      | <b>2.9%</b> |
| 44                                                                                      | 7.5              | 17           | 26           | 43                     | CC                                                    | AA                                                   | 34                      | -           |
| 45                                                                                      | 5.4              | 16           | 35           | 51                     | CC                                                    | AA                                                   | 36                      | -           |
| 46                                                                                      | 4.6              | 20           | 31           | 51                     | CC                                                    | AA                                                   | 39                      | -           |
| 47                                                                                      | 3.2              | 20           | 26           | 46                     | CC                                                    | AA                                                   | 33                      | <b>6.5%</b> |
| 48                                                                                      | 3.7              | 22           | -            | -                      | CC                                                    | AA                                                   | 41                      | <b>2.5%</b> |
| 49                                                                                      | 7.1              | 22           | -            | -                      | CC                                                    | AA                                                   | 39                      | <b>3.0%</b> |
| 50                                                                                      | 3.3              | 22           | -            | -                      | CC                                                    | AA                                                   | 48                      | -           |
| 51                                                                                      | 2.9              | 21           | -            | -                      | CC                                                    | AA                                                   | 45                      | <b>4.7%</b> |
| 52                                                                                      | 1.2              | 17           | 26           | 43                     | <b>CT</b>                                             | AA                                                   | 33                      | -           |
| 53                                                                                      | 9.3              | 20           | -            | -                      | CC                                                    | AA                                                   | 49                      | <b>2.3%</b> |
| 54                                                                                      | 7.7              | 22           | -            | -                      | CC                                                    | AA                                                   | 39                      | <b>3.1%</b> |
| <b>SAPHIR study – Extreme phenotype approach: no isoform detectable in Western blot</b> |                  |              |              |                        |                                                       |                                                      |                         |             |
| 55                                                                                      | 0.6              | -            | -            | -                      | <b>CT</b>                                             | AA                                                   | 59                      | -           |
| 56                                                                                      | 0.9              | -            | -            | -                      | CC                                                    | AA                                                   | 60                      | -           |
| 57                                                                                      | 0.8              | -            | -            | -                      | CC                                                    | AA                                                   | 39                      | <b>1.1%</b> |
| 58                                                                                      | 1.0              | -            | -            | -                      | CC                                                    | AA                                                   | 65                      | -           |
| 59                                                                                      | 2.6              | -            | -            | -                      | CC                                                    | AA                                                   | 41                      | -           |
| 60                                                                                      | 0.1              | -            | -            | -                      | CC                                                    | AA                                                   | 59                      | -           |
| 61                                                                                      | 1.2              | -            | -            | -                      | CC                                                    | AA                                                   | 58                      | -           |
| 62                                                                                      | 0.6              | -            | -            | -                      | CC                                                    | AA                                                   | 34                      | <b>3.3%</b> |
| 63                                                                                      | 0.1              | -            | -            | -                      | <b>TT</b>                                             | AA                                                   | 50                      | -           |
| 64                                                                                      | 0.4              | -            | -            | -                      | CC                                                    | AA                                                   | 56                      | -           |

**Supplementary Table S3: PCR protocols for mutation screening**

|                                | Batch amplification PCR for NGS SAPHIR | Batch amplification PCR for NGS GCKD | Sequencing of rs143431368 / NM_005577.2: c.4974-2A>G | Sequencing of rs41272114 / NM_005577.2: c.4289+1G>A |
|--------------------------------|----------------------------------------|--------------------------------------|------------------------------------------------------|-----------------------------------------------------|
| Product length (based on hg19) | 5,104 *                                | 5,104 *                              | 729                                                  | 448                                                 |
| Reaction vol. [μl]             | 25                                     | 25                                   | 10                                                   | 10                                                  |
| Enzyme                         | Qiagen long range PCR kit              | LongAmp® Taq DNA Polymerase          | Agilent Herculase II Fusion                          | Qiagen HotStar Taq                                  |
| Initial denaturation           | 93 °C, 2 min                           | 94 °C, 3 min                         | 95 °C, 2 min                                         | 94 °C, 3 min                                        |
| Denaturation                   | 93 °C, 15 s                            | 94 °C, 30 s                          | 95 °C, 20 s                                          | 94 °C, 30 s                                         |
| Annealing                      | 64.5 °C, 30 s                          | 64 °C, 30 s                          | 70 °C, 20 s                                          | 60 °C, 30 s                                         |
| Extension                      | 68 °C, 5 min                           | 65 °C, 5 min                         | 72 °C, 40 s                                          | 72 °C, 30 s                                         |
| Final extension                | 68 °C, 10 min                          | 65 °C, 10 min                        | 72 °C, 3 min                                         | 72 °C, 10 min                                       |
| Number of cycles               | 35                                     | 35                                   | 30                                                   | 30                                                  |
| Primer fw **, ***              | 421U_2                                 | 421U_2                               | LPA_c.4974_fw2                                       | LPA_rs41272114_f2                                   |
| Primer rv **, ***              | 422L                                   | 422L                                 | LPA_c.4974_rv1                                       | LPA_rs41272114_r1                                   |
| Final primer conc. [μM each]   | 0.6                                    | 0.4                                  | 0.25                                                 | 0.5                                                 |
| Final dNTP concentration [mM]  | 0.6                                    | 0.4                                  | 0.25                                                 | 0.2                                                 |
| Enzyme amount [μl]             | 0.25                                   | 1                                    | 0.2                                                  | 0.5                                                 |
| DNA input [ng]                 | 60                                     | 50                                   | 40                                                   | 20                                                  |

\* Based on the sixth KIV-2 in hg19 reference sequence. Actual length of products in batch PCR mixture might slightly vary.

\*\* For sequences see Supplementary Table S4

\*\*\* For rs143431368 and rs41272114 the PCR primer were used also for Sanger sequencing

**Supplementary Table S4: Primer sequences for mutation screening.**

| Name                            | Sequence 5'-3'             |
|---------------------------------|----------------------------|
| 421U <sub>2</sub> <sup>19</sup> | TCAGGATGCAGGGCATGAG        |
| 421L <sup>19</sup>              | TTTTTCTGACAATCGGAATATAC    |
| 422U <sup>19</sup>              | AGAAACAAACCTACTAAACCTGACAG |
| 422L <sup>19</sup>              | CACCAGAAATCACTCCGCTG       |
| LPA_c.4974_fw2                  | GAAACAGGCACCTTCTTCACAGGC   |
| LPA_c.4974_rv1                  | CCTTGGTCATGGCAGAACCTCAAC   |
| LPA_rs41272114_f2               | GGGTCCAGGACTGCTACCGA       |
| LPA_rs41272114_r1               | CTTAGTGGGCATTGTGGAATGATAC  |

**Supplementary Table S5: PCR protocols for minigene assays and clones generation**

|                                                    | Batch<br>amplification<br>PCR for TOPO<br>XL cloning | TOPO XL<br>mutagenesis                                         | Subcloning of<br>eGFP cassette<br>into pSPL3 | Subcloning<br>of <i>LPA</i> KIV-<br>2 in pSPL3 | pSPL3<br>minigene-<br>assay PCR   | pSPL3<br>mutagenesis for<br>frame correction             |
|----------------------------------------------------|------------------------------------------------------|----------------------------------------------------------------|----------------------------------------------|------------------------------------------------|-----------------------------------|----------------------------------------------------------|
| <b>Product length</b>                              | 2,645 *                                              | 6,164                                                          | 1,723                                        | 2,645                                          | 606                               | 10,424                                                   |
| <b>Reaction vol. [<math>\mu</math>l]</b>           | 25                                                   | 50                                                             | 10                                           | 10                                             | 50                                | 10                                                       |
| <b>Enzyme</b>                                      | Agilent<br>Herculase II<br>Fusion                    | Agilent<br>PfuUltra II<br>Fusion<br>HotStart DNA<br>Polymerase | Agilent<br>Herculase II<br>Fusion            | Agilent<br>Herculase II<br>Fusion              | Agilent<br>Herculase II<br>Fusion | Agilent PfuUltra II<br>Fusion HotStart<br>DNA Polymerase |
| <b>Initial denaturation</b>                        | 95 °C, 2 min                                         | 92 °C, 2 min                                                   | 95°C, 2 min                                  | 95 °C, 2 min                                   | 95 °C, 2 min                      | 92 °C, 2 min                                             |
| <b>Denaturation</b>                                | 95 °C, 20 s                                          | 92 °C, 10 s                                                    | 95 °C, 20 s                                  | 95 °C, 20 s                                    | 95 °C, 20 s                       | 92 °C, 10 s                                              |
| <b>Annealing</b>                                   | 56 °C, 20 s                                          | 67 °C, 20 s                                                    | 58 °C, 20 s                                  | 58 °C, 20 s                                    | 63 °C, 20 s                       | 65 °C, 20 s                                              |
| <b>Extension</b>                                   | 72 °C, 1:45 min                                      | 72 °C, 2 min                                                   | 72 °C, 2:40 min                              | 72 °C, 1:20<br>min                             | 72 °C, 30 s                       | 68 °C, 5.5 min                                           |
| <b>Final extension</b>                             | 72 °C, 3 min                                         | 68 °C, 5 min                                                   | 72 °C, 3 min                                 | 72 °C, 3 min                                   | 72 °C, 3 min                      | 68 °C, 5 min                                             |
| <b>Number of cycles</b>                            | 30                                                   | 18                                                             | 30                                           | 30                                             | 30                                | 18                                                       |
| <b>ID Primer fw **</b>                             | 422U                                                 | LPA422-<br>Mutg182aU                                           | EGFP-fw-HpaI                                 | 422U-<br>NotIHF                                | SD6                               | pSPL3_Lpa_Mut_fw                                         |
| <b>ID Primer rv **</b>                             | 421L                                                 | LPA422-<br>Mutg182aL                                           | EGFP-rv-HpaI                                 | 421L_BglII                                     | SA2                               | pSPL3_Lpa_mut_rv                                         |
| <b>Final primer conc. [<math>\mu</math>M each]</b> | 0.25                                                 | 0.20                                                           | 0.25                                         | 0.25                                           | 0.25                              | 0.20                                                     |
| <b>Final dNTP conc. [mM]</b>                       | 0.25                                                 | 0.25                                                           | 0.25                                         | 0.25                                           | 0.25                              | 0.25                                                     |
| <b>Enzyme amount [<math>\mu</math>l]</b>           | 0.5                                                  | 1                                                              | 0.2                                          | 0.2                                            | 1                                 | 0.20                                                     |
| <b>DNA input [ng]</b>                              | 100                                                  | 34                                                             | 5                                            | 5                                              | 1.5                               | 7                                                        |

\* Based on the sixth KIV-2 in hg19 reference sequence. Actual length of products in batch PCR mixture might slightly vary.

\*\* For sequences see Supplementary Table S6

**Supplementary Table S6: Primer sequences for clone generation and minigene assays. Bases for mutageneses are shown in red letters.**

| Name              | Sequence 5'-3'                               |
|-------------------|----------------------------------------------|
| 422U              | AGAAACAAACCTACTAAACCTGACAG                   |
| 421L              | TTTTCTGACAATCGGAATATAC                       |
| pEGFP-C1-del-rv   | TTATGATCATAACTTGTACAGCTCGTCCATGCCGAGAGTGATCC |
| pEGFP-C1-del-fw   | CTGTACAAGTTATGATCATAATCAGCCATACCACATTTGTAGAG |
| EGFP-fw-HpaI      | TTGGATGTAACTGATTCTGTGGATAACC                 |
| EGFP-rv-HpaI      | TAATATGTAACTATCTCGGTCTATTCTTTTGAT            |
| 422U-NotIHF       | TAGGATGCGCCGCAGAAACAAACCTACTAAACCTGACAG      |
| 421L_BglII        | TGGTTTAGATCTTTTTCTGACAATCGGAATATAC           |
| SD6 <sup>31</sup> | TCTGAGTCACCTGGACAACC                         |
| SA2 <sup>31</sup> | ATCTCAGTGGTATTTGTGAGC                        |
| 422U_2(GE)-BglII  | TAATAAAGATCTAGAGATGTGCAGAGAGGATTAGTG         |
| 422L-MluI         | TAATAAACGCGTCACCAGAAATCACTCCGCTG             |
| LPA422-Mutg182aU  | GGCTCCTCCGAACAAAGTAAGGAGTCTGTGGC             |
| LPA422-Mutg182aL  | GCCACAGACTCCTTACTTTGTTCGGAAGGAGCC            |
| pSPL3_Lpa_Mut_fw  | GGAATTTCCAGTGGCTTGATCTCATGAACTACTGCAG        |
| pSPL3_Lpa_mut_rv  | CTGCAGTAGTTCATGAGATCAAGCCACTGGAAATTCC        |

**Supplementary Table S7: Frequency of known splice site defects in KIV-7 (rs41272114) and KIV-10 (rs143431368) in the discovery set.**

|                                | Group             | n  | rs41272114<br>CT/TT* | rs143431368<br>AG/GG* |
|--------------------------------|-------------------|----|----------------------|-----------------------|
| <b>SAPHIR study</b>            |                   |    |                      |                       |
| HMW Isoform, expected Lp(a)    | Controls          | 15 | 2/0                  | 2/0                   |
| LMW Isoform, expected Lp(a)    | Controls          | 8  | 0/0                  | 0/0                   |
| High Lp(a) despite HMW isoform | Extreme phenotype | 18 | 1/0                  | 0/0                   |
| Low Lp(a) despite LMW isoform  | Extreme phenotype | 13 | 1/0                  | 0/0                   |
| No detectable isoform          | Extreme phenotype | 12 | 1/1                  | 0/0                   |
| <b>GCKD study</b>              |                   |    |                      |                       |
| HMW Isoform, expected Lp(a)    | Controls          | 13 | 1/0                  | 0/0                   |
| LMW Isoform, expected Lp(a)    | Controls          | 7  | 0/0                  | 0/0                   |
| High Lp(a) despite HMW isoform | Extreme phenotype | 15 | 0/0                  | 0/0                   |
| Low Lp(a) despite LMW isoform  | Extreme phenotype | 18 | 2/0                  | 0/0                   |
| No detectable isoform & other  | Extreme phenotype | 6  | 1/1                  | 0/0                   |

\* Heterozygotes and homozygotes for the rare allele

**Summary:** Together 3 heterozygote carriers in the control group (from 43) and 6 heterozygotes and 2 homozygote carriers of the rare allele in the extreme phenotype group (from 78); p-value Fishers exact test = 0.87

**Supplementary Table S8: Number of G4925A carriers in the 1000 Genome exome data. Only exome data with >1000X coverage on variant position was used (n=1,589).**

| <b>Superpopulation/<br/>Population</b> | <b>Description</b>                         | <b>Non-carriers</b> | <b>carriers</b> | <b>Total</b> | <b>Carrier<br/>frequency</b> |
|----------------------------------------|--------------------------------------------|---------------------|-----------------|--------------|------------------------------|
| <b>AFR</b>                             | <b>African</b>                             | <b>514</b>          | <b>14</b>       | <b>528</b>   | <b>0.027</b>                 |
| ACB                                    | African Caribbeans in Barbados             | 58                  | 3               | 61           | 0.049                        |
| ASW                                    | Americans of African Ancestry in SW USA    | 54                  | 3               | 57           | 0.053                        |
| ESN                                    | Esan in Nigeria                            | 98                  | 1               | 99           | 0.010                        |
| GWD                                    | Gambian in Western Divisions in the Gambia | 108                 | 5               | 113          | 0.044                        |
| LWK                                    | Luhya in Webuye, Kenya                     | 40                  | 0               | 40           | 0.000                        |
| MSL                                    | Mende in Sierra Leone                      | 84                  | 1               | 85           | 0.012                        |
| YRI                                    | Yoruba in Ibadan, Nigeria                  | 72                  | 1               | 73           | 0.014                        |
| <b>AMR</b>                             | <b>Ad Mixed American</b>                   | <b>219</b>          | <b>37</b>       | <b>256</b>   | <b>0.145</b>                 |
| CLM                                    | Colombians from Medellin, Colombia         | 52                  | 13              | 65           | 0.200                        |
| MXL                                    | Mexican Ancestry from Los Angeles USA      | 46                  | 13              | 59           | 0.220                        |
| PEL                                    | Peruvians from Lima, Peru                  | 43                  | 4               | 47           | 0.085                        |
| PUR                                    | Puerto Ricans from Puerto Rico             | 78                  | 7               | 85           | 0.082                        |

... to be continued

**Supplementary Table S8: continued**

| <b>Superpopulation/<br/>Population</b> | <b>Description</b>                                       | <b>Non-carriers</b> | <b>carriers</b> | <b>Total</b> | <b>Carrier frequency</b> |
|----------------------------------------|----------------------------------------------------------|---------------------|-----------------|--------------|--------------------------|
| <b>EAS</b>                             | <b>East Asian</b>                                        | <b>148</b>          | <b>2</b>        | <b>150</b>   | <b>0.013</b>             |
| CDX                                    | Chinese Dai in Xishuangbanna, China                      | 5                   | 0               | 5            | 0.000                    |
| CHB                                    | Han Chinese in Beijing, China                            | 19                  | 0               | 19           | 0.000                    |
| CHS                                    | Southern Han Chinese                                     | 23                  | 0               | 23           | 0.000                    |
| JPT                                    | Japanese in Tokyo, Japan                                 | 65                  | 2               | 67           | 0.030                    |
| KHV                                    | Kinh in Ho Chi Minh City, Vietnam                        | 36                  | 0               | 36           | 0.000                    |
| <b>EUR</b>                             | <b>European</b>                                          | <b>146</b>          | <b>46</b>       | <b>192</b>   | <b>0.240</b>             |
| CEU                                    | Utah Residents (CEPH) with Northern and Western Ancestry | 32                  | 12              | 44           | 0.273                    |
| FIN                                    | Finnish in Finland                                       | 25                  | 5               | 30           | 0.167                    |
| GBR                                    | British in England and Scotland                          | 28                  | 8               | 36           | 0.222                    |
| IBS                                    | Iberian Population in Spain                              | 23                  | 8               | 31           | 0.258                    |
| TSI                                    | Toscani in Italia                                        | 38                  | 13              | 51           | 0.255                    |
| <b>SAS</b>                             | <b>South Asian</b>                                       | <b>400</b>          | <b>63</b>       | <b>463</b>   | <b>0.136</b>             |
| BEB                                    | Bengali from Bangladesh                                  | 78                  | 6               | 84           | 0.071                    |
| GIH                                    | Gujarati Indian from Houston, Texas                      | 68                  | 9               | 77           | 0.117                    |
| ITU                                    | Indian Telugu from the UK                                | 86                  | 17              | 103          | 0.165                    |
| PJL                                    | Punjabi from Lahore, Pakistan                            | 84                  | 12              | 96           | 0.125                    |
| STU                                    | Sri Lankan Tamil from the UK                             | 84                  | 19              | 103          | 0.184                    |



**Supplementary Table S9: 1000 Genomes Exome set.**

Individual data for G4925A carriers from all 1000G exome samples (>1000X) at variant position.

| SampleID   | POS in reference | Change | Mutation level | Coverage Forward | Coverage Reverse | Total Coverage | Pop |
|------------|------------------|--------|----------------|------------------|------------------|----------------|-----|
| <b>AFR</b> |                  |        |                |                  |                  |                |     |
| HG02014    | 4925             | G>A    | 0.0343         | 3347             | 10123            | 13470          | ACB |
| HG02501    | 4925             | G>A    | 0.0433         | 890              | 1280             | 2170           | ACB |
| HG02554    | 4925             | G>A    | 0.0352         | 634              | 1726             | 2360           | ACB |
| NA19703    | 4925             | G>A    | 0.0289         | 498              | 1646             | 2144           | ASW |
| NA20276    | 4925             | G>A    | 0.0625         | 922              | 2772             | 3694           | ASW |
| NA20341    | 4925             | G>A    | 0.0345         | 1262             | 3867             | 5129           | ASW |
| HG02971    | 4925             | G>A    | 0.0299         | 1062             | 2713             | 3775           | ESN |
| HG02595    | 4925             | G>A    | 0.0649         | 2193             | 4818             | 7011           | GWD |
| HG02807    | 4925             | G>A    | 0.0275         | 2456             | 5186             | 7642           | GWD |
| HG02840    | 4925             | G>A    | 0.0270         | 1037             | 2626             | 3663           | GWD |
| HG02852    | 4925             | G>A    | 0.0258         | 1261             | 3314             | 4575           | GWD |
| HG03028    | 4925             | G>A    | 0.0189         | 2748             | 6118             | 8866           | GWD |
| HG03559    | 4925             | G>A    | 0.0287         | 712              | 858              | 1570           | MSL |
| NA18881    | 4925             | G>A    | 0.0282         | 1009             | 2602             | 3611           | YRI |
| <b>AMR</b> |                  |        |                |                  |                  |                |     |
| HG01112    | 4925             | G>A    | 0.024          | 846              | 3117             | 3963           | CLM |
| HG01269    | 4925             | G>A    | 0.0265         | 1424             | 3981             | 5405           | CLM |
| HG01280    | 4925             | G>A    | 0.0224         | 883              | 2464             | 3347           | CLM |
| HG01341    | 4925             | G>A    | 0.0302         | 670              | 2008             | 2678           | CLM |
| HG01360    | 4925             | G>A    | 0.0435         | 834              | 2314             | 3148           | CLM |
| HG01431    | 4925             | G>A    | 0.0310         | 1068             | 2678             | 3746           | CLM |
| HG01432    | 4925             | G>A    | 0.0313         | 932              | 2163             | 3095           | CLM |
| HG01440    | 4925             | G>A    | 0.0193         | 617              | 1866             | 2483           | CLM |
| HG01455    | 4925             | G>A    | 0.0315         | 1314             | 3834             | 5148           | CLM |
| HG01464    | 4925             | G>A    | 0.0224         | 680              | 1959             | 2639           | CLM |
| HG01488    | 4925             | G>A    | 0.0262         | 624              | 1823             | 2447           | CLM |
| HG01489    | 4925             | G>A    | 0.0292         | 692              | 2045             | 2737           | CLM |
| HG01498    | 4925             | G>A    | 0.0513         | 1282             | 3570             | 4852           | CLM |
| NA19658    | 4925             | G>A    | 0.0279         | 579              | 1787             | 2366           | MXL |
| NA19661    | 4925             | G>A    | 0.0263         | 582              | 1777             | 2359           | MXL |
| NA19664    | 4925             | G>A    | 0.0208         | 707              | 2076             | 2783           | MXL |
| NA19717    | 4925             | G>A    | 0.0318         | 612              | 1837             | 2449           | MXL |
| NA19731    | 4925             | G>A    | 0.0320         | 1401             | 3938             | 5339           | MXL |
| NA19732    | 4925             | G>A    | 0.0316         | 1527             | 4104             | 5631           | MXL |
| NA19759    | 4925             | G>A    | 0.0336         | 1417             | 4175             | 5592           | MXL |
| NA19762    | 4925             | G>A    | 0.0342         | 545              | 2434             | 2979           | MXL |
| NA19780    | 4925             | G>A    | 0.0279         | 735              | 2773             | 3508           | MXL |
| NA19782    | 4925             | G>A    | 0.0301         | 1024             | 3492             | 4516           | MXL |
| NA19783    | 4925             | G>A    | 0.0230         | 1275             | 3978             | 5253           | MXL |
| NA19785    | 4925             | G>A    | 0.0272         | 1213             | 3833             | 5046           | MXL |
| NA19792    | 4925             | G>A    | 0.0334         | 1161             | 2494             | 3655           | MXL |

... to be continued

Supplementary Table S9: continued

| SampleID             | POS in reference | Change | Mutation level | Coverage Forward | Coverage Reverse | Total Coverage | Pop |
|----------------------|------------------|--------|----------------|------------------|------------------|----------------|-----|
| <b>AMR continued</b> |                  |        |                |                  |                  |                |     |
| HG01927              | 4925             | G>A    | 0.0197         | 3010             | 8914             | 11924          | PEL |
| HG01967              | 4925             | G>A    | 0.0313         | 4030             | 12057            | 16087          | PEL |
| HG01976              | 4925             | G>A    | 0.0239         | 5202             | 14556            | 19758          | PEL |
| HG02298              | 4925             | G>A    | 0.0305         | 1236             | 3907             | 5143           | PEL |
| HG00734              | 4925             | G>A    | 0.0262         | 2595             | 11170            | 13765          | PUR |
| HG01092              | 4925             | G>A    | 0.0405         | 722              | 1007             | 1729           | PUR |
| HG01098              | 4925             | G>A    | 0.0281         | 946              | 3853             | 4799           | PUR |
| HG01102              | 4925             | G>A    | 0.0223         | 931              | 4304             | 5235           | PUR |
| HG01190              | 4925             | G>A    | 0.0236         | 1457             | 5082             | 6539           | PUR |
| HG01204              | 4925             | G>A    | 0.0249         | 1924             | 8194             | 10118          | PUR |
| HG01325              | 4925             | G>A    | 0.0231         | 1160             | 1476             | 2636           | PUR |
| <b>EAS</b>           |                  |        |                |                  |                  |                |     |
| NA18970              | 4925             | G>A    | 0.0257         | 1388             | 4016             | 5404           | JPT |
| NA19076              | 4925             | G>A    | 0.0256         | 929              | 3254             | 4183           | JPT |
| <b>EUR</b>           |                  |        |                |                  |                  |                |     |
| NA06984              | 4925             | G>A    | 0.0223         | 783              | 2171             | 2954           | CEU |
| NA06994              | 4925             | G>A    | 0.0643         | 907              | 2856             | 3763           | CEU |
| NA07048              | 4925             | G>A    | 0.0244         | 1834             | 6993             | 8827           | CEU |
| NA07347              | 4925             | G>A    | 0.0283         | 897              | 4129             | 5026           | CEU |
| NA11920              | 4925             | G>A    | 0.0255         | 1412             | 8189             | 9601           | CEU |
| NA12272              | 4925             | G>A    | 0.0765         | 1241             | 3491             | 4732           | CEU |
| NA12282              | 4925             | G>A    | 0.0657         | 1068             | 3465             | 4533           | CEU |
| NA12286              | 4925             | G>A    | 0.0319         | 1315             | 3636             | 4951           | CEU |
| NA12718              | 4925             | G>A    | 0.0246         | 1386             | 4093             | 5479           | CEU |
| NA12761              | 4925             | G>A    | 0.0331         | 777              | 2272             | 3049           | CEU |
| NA12842              | 4925             | G>A    | 0.0655         | 1645             | 11325            | 12970          | CEU |
| NA12890              | 4925             | G>A    | 0.0329         | 2278             | 8170             | 10448          | CEU |
| HG00190              | 4925             | G>A    | 0.0233         | 1443             | 4812             | 6255           | FIN |
| HG00272              | 4925             | G>A    | 0.0254         | 655              | 2657             | 3312           | FIN |
| HG00306              | 4925             | G>A    | 0.0688         | 482              | 2063             | 2545           | FIN |
| HG00367              | 4925             | G>A    | 0.0361         | 553              | 2386             | 2939           | FIN |
| HG00380              | 4925             | G>A    | 0.0239         | 629              | 2465             | 3094           | FIN |
| HG00117              | 4925             | G>A    | 0.0269         | 1296             | 4984             | 6280           | GBR |
| HG00123              | 4925             | G>A    | 0.0217         | 1184             | 4288             | 5472           | GBR |
| HG00131              | 4925             | G>A    | 0.0263         | 1298             | 4759             | 6057           | GBR |
| HG00145              | 4925             | G>A    | 0.0296         | 1139             | 4840             | 5979           | GBR |
| HG00155              | 4925             | G>A    | 0.0261         | 1733             | 7070             | 8803           | GBR |
| HG00159              | 4925             | G>A    | 0.0379         | 730              | 3074             | 3804           | GBR |
| HG00244              | 4925             | G>A    | 0.0258         | 1354             | 5131             | 6485           | GBR |
| HG00265              | 4925             | G>A    | 0.0527         | 834              | 3173             | 4007           | GBR |

... to be continued

Supplementary Table S9: continued

| SampleID             | POS in reference | Change | Mutation level | Coverage Forward | Coverage Reverse | Total Coverage | Pop |
|----------------------|------------------|--------|----------------|------------------|------------------|----------------|-----|
| <b>EUR continued</b> |                  |        |                |                  |                  |                |     |
| HG01515              | 4925             | G>A    | 0.0232         | 1175             | 4869             | 6044           | IBS |
| HG01518              | 4925             | G>A    | 0.0231         | 1271             | 5228             | 6499           | IBS |
| HG01519              | 4925             | G>A    | 0.0238         | 1207             | 5102             | 6309           | IBS |
| HG01521              | 4925             | G>A    | 0.0354         | 2072             | 8594             | 10666          | IBS |
| HG01697              | 4925             | G>A    | 0.0224         | 40873            | 116560           | 157433         | IBS |
| HG01707              | 4925             | G>A    | 0.0209         | 3359             | 9439             | 12798          | IBS |
| HG01708              | 4925             | G>A    | 0.0244         | 3139             | 8765             | 11904          | IBS |
| HG01766              | 4925             | G>A    | 0.0378         | 408              | 1072             | 1480           | IBS |
| NA20763              | 4925             | G>A    | 0.0398         | 863              | 2103             | 2966           | TSI |
| NA20771              | 4925             | G>A    | 0.0247         | 683              | 2110             | 2793           | TSI |
| NA20778              | 4925             | G>A    | 0.0196         | 703              | 2108             | 2811           | TSI |
| NA20786              | 4925             | G>A    | 0.0148         | 885              | 2488             | 3373           | TSI |
| NA20800              | 4925             | G>A    | 0.0612         | 1031             | 3466             | 4497           | TSI |
| NA20802              | 4925             | G>A    | 0.0242         | 1250             | 5039             | 6289           | TSI |
| NA20803              | 4925             | G>A    | 0.1070         | 1237             | 4335             | 5572           | TSI |
| NA20804              | 4925             | G>A    | 0.0251         | 707              | 3714             | 4421           | TSI |
| NA20805              | 4925             | G>A    | 0.0325         | 809              | 3963             | 4772           | TSI |
| NA20807              | 4925             | G>A    | 0.0431         | 668              | 1975             | 2643           | TSI |
| NA20808              | 4925             | G>A    | 0.0360         | 813              | 2632             | 3445           | TSI |
| NA20813              | 4925             | G>A    | 0.0341         | 1023             | 3082             | 4105           | TSI |
| NA20814              | 4925             | G>A    | 0.0291         | 1000             | 3191             | 4191           | TSI |
| <b>SAS</b>           |                  |        |                |                  |                  |                |     |
| HG03615              | 4925             | G>A    | 0.0332         | 1169             | 3112             | 4281           | BEB |
| HG03805              | 4925             | G>A    | 0.0282         | 915              | 2527             | 3442           | BEB |
| HG03902              | 4925             | G>A    | 0.0182         | 1488             | 3844             | 5332           | BEB |
| HG04144              | 4925             | G>A    | 0.0164         | 745              | 1877             | 2622           | BEB |
| HG04173              | 4925             | G>A    | 0.0270         | 1049             | 1465             | 2514           | BEB |
| HG04182              | 4925             | G>A    | 0.0191         | 871              | 1166             | 2037           | BEB |
| NA20852              | 4925             | G>A    | 0.0235         | 2895             | 8358             | 11253          | GIH |
| NA20872              | 4925             | G>A    | 0.0208         | 3304             | 9057             | 12361          | GIH |
| NA20878              | 4925             | G>A    | 0.0218         | 2171             | 6369             | 8540           | GIH |
| NA20893              | 4925             | G>A    | 0.0239         | 2247             | 6290             | 8537           | GIH |
| NA20894              | 4925             | G>A    | 0.0654         | 2063             | 5921             | 7984           | GIH |
| NA21093              | 4925             | G>A    | 0.0267         | 1918             | 5786             | 7704           | GIH |
| NA21094              | 4925             | G>A    | 0.0675         | 1207             | 3801             | 5008           | GIH |
| NA21098              | 4925             | G>A    | 0.0231         | 1110             | 3347             | 4457           | GIH |
| NA21124              | 4925             | G>A    | 0.0334         | 1266             | 2711             | 3977           | GIH |
| HG03729              | 4925             | G>A    | 0.0286         | 1545             | 4229             | 5774           | ITU |
| HG03731              | 4925             | G>A    | 0.0287         | 1392             | 3595             | 4987           | ITU |
| HG03775              | 4925             | G>A    | 0.0248         | 2098             | 5902             | 8000           | ITU |
| HG03784              | 4925             | G>A    | 0.0246         | 1789             | 5035             | 6824           | ITU |
| HG03787              | 4925             | G>A    | 0.0357         | 1122             | 3105             | 4227           | ITU |

... to be continued

Supplementary Table S9: continued

| SampleID             | POS in reference | Change | Mutation level | Coverage Forward | Coverage Reverse | Total Coverage | Pop |
|----------------------|------------------|--------|----------------|------------------|------------------|----------------|-----|
| <b>SAS continued</b> |                  |        |                |                  |                  |                |     |
| HG03863              | 4925             | G>A    | 0.0244         | 1192             | 2908             | 4100           | ITU |
| HG03871              | 4925             | G>A    | 0.0210         | 916              | 1270             | 2186           | ITU |
| HG03872              | 4925             | G>A    | 0.0289         | 1943             | 4278             | 6221           | ITU |
| HG03976              | 4925             | G>A    | 0.0307         | 1159             | 3017             | 4176           | ITU |
| HG04001              | 4925             | G>A    | 0.0269         | 888              | 1233             | 2121           | ITU |
| HG04056              | 4925             | G>A    | 0.0132         | 1116             | 1460             | 2576           | ITU |
| HG04060              | 4925             | G>A    | 0.0309         | 1312             | 2017             | 3329           | ITU |
| HG04070              | 4925             | G>A    | 0.0734         | 726              | 1957             | 2683           | ITU |
| HG04080              | 4925             | G>A    | 0.0358         | 811              | 1088             | 1899           | ITU |
| HG04118              | 4925             | G>A    | 0.0347         | 862              | 1273             | 2135           | ITU |
| HG04198              | 4925             | G>A    | 0.0281         | 1036             | 3133             | 4169           | ITU |
| HG04225              | 4925             | G>A    | 0.0226         | 1052             | 2579             | 3631           | ITU |
| HG01593              | 4925             | G>A    | 0.0301         | 786              | 1106             | 1892           | PJL |
| HG02603              | 4925             | G>A    | 0.0214         | 2479             | 5828             | 8307           | PJL |
| HG02652              | 4925             | G>A    | 0.0297         | 1077             | 2969             | 4046           | PJL |
| HG02657              | 4925             | G>A    | 0.0536         | 1742             | 3953             | 5695           | PJL |
| HG02658              | 4925             | G>A    | 0.0579         | 2107             | 4613             | 6720           | PJL |
| HG02690              | 4925             | G>A    | 0.0296         | 835              | 1905             | 2740           | PJL |
| HG02727              | 4925             | G>A    | 0.0208         | 2095             | 4860             | 6955           | PJL |
| HG02731              | 4925             | G>A    | 0.0304         | 1208             | 1590             | 2798           | PJL |
| HG02774              | 4925             | G>A    | 0.0233         | 890              | 2371             | 3261           | PJL |
| HG03624              | 4925             | G>A    | 0.0245         | 1280             | 1822             | 3102           | PJL |
| HG03663              | 4925             | G>A    | 0.0254         | 2240             | 5193             | 7433           | PJL |
| HG03706              | 4925             | G>A    | 0.0292         | 1033             | 1366             | 2399           | PJL |
| HG03643              | 4925             | G>A    | 0.0251         | 2028             | 5746             | 7774           | STU |
| HG03645              | 4925             | G>A    | 0.0251         | 1273             | 2985             | 4258           | STU |
| HG03689              | 4925             | G>A    | 0.0225         | 1147             | 2950             | 4097           | STU |
| HG03733              | 4925             | G>A    | 0.0366         | 1001             | 2606             | 3607           | STU |
| HG03740              | 4925             | G>A    | 0.0468         | 1276             | 3617             | 4893           | STU |
| HG03746              | 4925             | G>A    | 0.0178         | 1911             | 5330             | 7241           | STU |
| HG03750              | 4925             | G>A    | 0.0248         | 1604             | 4047             | 5651           | STU |
| HG03755              | 4925             | G>A    | 0.0266         | 1822             | 4045             | 5867           | STU |
| HG03836              | 4925             | G>A    | 0.0174         | 1055             | 2731             | 3786           | STU |
| HG03838              | 4925             | G>A    | 0.0567         | 2381             | 6271             | 8652           | STU |
| HG03844              | 4925             | G>A    | 0.0226         | 1573             | 4182             | 5755           | STU |
| HG03854              | 4925             | G>A    | 0.0725         | 721              | 1625             | 2346           | STU |
| HG03857              | 4925             | G>A    | 0.0275         | 1104             | 2681             | 3785           | STU |
| HG03886              | 4925             | G>A    | 0.0539         | 1202             | 3361             | 4563           | STU |
| HG03887              | 4925             | G>A    | 0.0270         | 1765             | 4935             | 6700           | STU |
| HG03894              | 4925             | G>A    | 0.0250         | 1216             | 1579             | 2795           | STU |
| HG03986              | 4925             | G>A    | 0.0256         | 1895             | 5067             | 6962           | STU |
| HG03995              | 4925             | G>A    | 0.0208         | 1268             | 3347             | 4615           | STU |
| HG04229              | 4925             | G>A    | 0.0261         | 834              | 2236             | 3070           | STU |

**Supplementary Table S10: 1000 Genomes high coverage data set (PCR-free whole genome sequencing data).**

Individual data for G4925A carriers from all 1000G high coverage data set. Please note, that the overall coverage in the 1000G high coverage data set is lower than the coverage of the same samples in the exome data (Supplementary Table S9). Thus this analysis has to be seen complementary, but with lower confidence than the exome data set. No sample achieved a coverage >1000X at the G4925A position ( $555 \pm 156$  (mean  $\pm$  SD)). HG01112 is confirmed also in the exome data in Supplementary Table S9, albeit with a considerably higher coverage (3,963X), while HG01565 is not included in Supplementary Table S9 since coverage in the exome data set was only 201X. However, using coverage-unrestricted analysis, HG01565 is indeed detected as G4925A carrier also in the 1000G exome data at a mutation level of 0.0398.

| SampleID | POS in reference | Change | Mutation level | Coverage Forward | Coverage Reverse | Total Coverage | Pop |
|----------|------------------|--------|----------------|------------------|------------------|----------------|-----|
| HG01112  | 4925             | G>A    | 0.038          | 197              | 275              | 472            | CLM |
| HG01565  | 4925             | G>A    | 0.014          | 140              | 199              | 339            | PEL |

**Supplementary Table S11: Individual data for G4925A carriers in the GenomeAustria project (PCR-free whole genome sequencing data; n=8 whole genome sequenced individuals from Austria).**

All other samples were non-carriers.

| SampleID  | POS in reference | Change | Mutation level | Coverage Forward | Coverage Reverse | Total Coverage |
|-----------|------------------|--------|----------------|------------------|------------------|----------------|
| PGA1.K4_6 | 4925             | G>A    | 0.035          | 193              | 208              | 401            |
| PGA9.K4_6 | 4925             | G>A    | 0.056          | 135              | 150              | 285            |

**Supplementary Table S12: Classification performance of castPCR assay.**

All 123 samples of the NGS discovery phase were re-typed using the castPCR assay as described in the Online Methods of the main manuscript. In brief, the same input amount of each sample was typed in parallel using the wild-type and the mutation detection assay and data was analyzed according manufacturer protocol. Samples showing a deltaCt cut-off <9 were counted as positive carriers. The NGS result was considered as gold standard.

|                                      |            |
|--------------------------------------|------------|
| <b>Calls [n]</b>                     | <b>123</b> |
| <b>True Positives [n]</b>            | 31         |
| <b>False Positives [n]</b>           | 0          |
| <b>True Negatives [n]</b>            | 93         |
| <b>False Negatives [n]</b>           | 1          |
| <hr/>                                |            |
| <b>Sensitivity [%]</b>               | 96.9%      |
| <b>Specificity [%]</b>               | 100.0%     |
| <b>Accuracy [%]</b>                  | 99.2%      |
| <b>Precision (PPV) [%]</b>           | 100.0%     |
| <b>False Discovery Rate [%]</b>      | 0.0%       |
| <b>Negative Predictive Value [%]</b> | 98.9%      |

**Supplementary Table S13: Crosstable for G4925A and rs75692336 carrier status.**

rs75692336 is coded dominantly, since heterozygous and homozygous G4925A carrier status cannot be discerned by castPCR

|                           | <b>rs75692336<br/>non-carrier (CC)</b> | <b>rs75692336<br/>carrier (CA/AA)</b> |
|---------------------------|----------------------------------------|---------------------------------------|
| <b>G4925A non-carrier</b> | <b>2189</b>                            | <b>63</b>                             |
| <b>G4925A carrier</b>     | <b>7</b>                               | <b>633</b>                            |

**Supplementary Table S14: Comparison of association with Lp(a) for G4925A and rs75692336**

| Group                         | G4925A:<br>KORAF4         |          |                     | rs75692336:<br>Dominant model in KORAF4 study |          |                     | rs75692336:<br>Dominant model in GCKD study |          |                     |
|-------------------------------|---------------------------|----------|---------------------|-----------------------------------------------|----------|---------------------|---------------------------------------------|----------|---------------------|
|                               | $\beta_{\text{original}}$ | $p^{\#}$ | R <sup>2</sup> in % | $\beta_{\text{original}}$                     | $p^{\#}$ | R <sup>2</sup> in % | $\beta_{\text{original}}$                   | $p^{\#}$ | R <sup>2</sup> in % |
| <b>Unadjusted model</b>       |                           |          |                     |                                               |          |                     |                                             |          |                     |
| All participants              | -8.1                      | 0.006    | 0.2                 | -2.3                                          | 0.195    | 0.02                | -2.3                                        | 0.002    | 0.2                 |
| LMW only                      | -31.3                     | 5.57e-38 | 20.6                | -21.7                                         | 6.10e-21 | 11.4                | -29.5                                       | 5.6e-50  | 16.4                |
| HMW only                      | -2.5                      | 0.231    | 0.02                | +0.19                                         | 7.45E-04 | 0.5                 | +0.4                                        | 2.04e-08 | 0.8                 |
| <b>Isoform-adjusted model</b> |                           |          |                     |                                               |          |                     |                                             |          |                     |
| All participants              | -21.3                     | 1.05E-55 | 6.1 (*)             | -15.7                                         | 3.99e-31 | 3.3 (*)             | -19                                         | 9.09e-45 | 2.9 (*)             |
| LMW only                      | -30.6                     | 3.0e-36  | 19.3 (*)            | -20.9                                         | 7.60e-19 | 10.0 (*)            | -29.0                                       | 5.98e-47 | 15.3 (*)            |
| HMW only                      | -10                       | 1.69e-10 | 1.6 (*)             | -6.5                                          | 4.78e-05 | 0.7 (*)             | -6.6                                        | 3.39E-03 | 0.2 (*)             |

(\*) variance explained by G4925A/rs75692336 additionally to apo(a) isoforms

<sup>#</sup> The p-value refers to linear regression analysis on inverse-normal transformed Lp(a) concentrations; the  $\beta$ -estimate is based on the original scale of Lp(a)



**Supplementary Table S15: Comparison of *LPA* genotype determined by Western Blot in plasma and by pulsed field gel electrophoresis (PFGE) on genomic DNA level.**

N.B.: Since the PFGE fragment assessed in PFGE exceeds 100 kb for any isoform >27 KIV repeats, the differences between WB and PFGE in the larger isoform are expected and are due to the more difficult separation of larger fragments, respectively the optimization of the PFGE protocol for smaller isoforms.

A truncation of the protein at the last KIV-2 repeat would, however, result in a molecular weight difference corresponding to about 11 KIV repeats. Such a large difference is not visible for any of the G4925A carriers, indicating that no truncated protein form occurs.

| #  | Sample ID | G4925A carrier status | Lp(a) (mg/dL) | WB Isoform 1 | WB Isoform 2 | PFGE Isoform 1 | PFGE Isoform 2 |
|----|-----------|-----------------------|---------------|--------------|--------------|----------------|----------------|
| 1  | AK5       | No                    | 7.1           | 35           | 39           | 30             | 35             |
| 2  | AK7       | No                    | 45.2          | 19           | 32           | 21             | 28             |
| 3  | AK10      | No                    | 12.3          | 24           | 31           | 24             | 29             |
| 4  | AK12      | No                    | 1.5           | 21           | 28           | 23             | 26             |
| 5  | AK19      | No                    | 41.7          | 20           | 30           | 21             | 27             |
| 6  | AK29      | No                    | 16.5          | 28           | 32           | 25             | 28             |
| 7  | AK17      | <b>Yes</b>            | 9.6           | 24           | 38           | 24             | 32             |
| 8  | AK23      | <b>Yes</b>            | 11.2          | 24           | 28           | 24             | 27             |
| 9  | AK28      | <b>Yes</b>            | 8.1           | 24           | 36           | 23             | 30             |
| 10 | AK33      | <b>Yes</b>            | 3.5           | 20           | 23           | 22             | 23             |
| 11 | AK38      | <b>Yes</b>            | 14.3          | 22           | 38           | 23             | 33             |

**Supplementary Table S16: qPCR Protocol**

|                                    |                                                                            |
|------------------------------------|----------------------------------------------------------------------------|
| <b>Primer fw (5'-3')</b>           | GTGGCAGCTCCTTATTGTTATACG                                                   |
| <b>Primer rv (5'-3')</b>           | CGACGGCAGTCCCTTCTG                                                         |
| <b>Probe (5'-3')</b>               | TACTGCAACCTGACGCAATGCTCAGAC                                                |
| <b>Reporter/ Quencher</b>          | FAM / BHQ1                                                                 |
| <b>Initial denaturation</b>        | 95 °C, 10 min                                                              |
| <b>Denaturation</b>                | 95 °C, 15 s                                                                |
| <b>Annealing / Extension</b>       | 60 °C, 1 min                                                               |
| <b>Number of cycles</b>            | 40                                                                         |
| <b>Manual Ct threshold setting</b> | 0.2                                                                        |
| <b>Reaction mix</b>                | Type-it Fast SNP Probe PCR Kit qPCR Mastermix<br>(Qiagen, Hilden, Germany) |

Primers and probes were purchased from Microsynth AG, Balgach, CH

**Supplementary Table S17: PCR protocol for deletion of MCS from pEGFP-C1 according to <sup>20</sup>**

|                                       |                                |
|---------------------------------------|--------------------------------|
| <b>Product length (based on hg19)</b> | 4,731 (4,652 with deleted MCS) |
| <b>Reaction vol. [μl]</b>             | 50                             |
| <b>Enzyme</b>                         | Agilent Herculase II Fusion    |
| <b>ID Primer fw *</b>                 | pEGFP-C1-del-fw                |
| <b>ID Primer rv *</b>                 | pEGFP-C1-del-rv                |
| <b>Final primer conc. [μM each]</b>   | 0.25 μM                        |
| <b>Final dNTP concentration [mM]</b>  | 0.25 mM                        |
| <b>Enzyme amount [μl]</b>             | 1                              |
| <b>DNA input [ng]</b>                 | 5                              |

**PCR cycling protocol**

|                                      |                   |
|--------------------------------------|-------------------|
| <b>Initial denaturation</b>          | 95 °C, 4 min      |
| <b>Cycling block 1, denaturation</b> | 95 °C, 20 s       |
| <b>Cycling block 1, annealing</b>    | 66 °C, 40 s       |
| <b>Cycling block 1, extension</b>    | 72 °C, 2 min 40 s |
| <b>Number of cycles, block 1</b>     | 20                |
| <b>Cycling block 2, denaturation</b> | 95 °C, 20 s       |
| <b>Cycling block 2, annealing</b>    | 66 °C, 40 s       |
| <b>Cycling block 2, extension</b>    | 72 °C, 2 min 40 s |
| <b>Number of cycles, block 2</b>     | 1                 |

\* For sequences see Supplementary Table S6

**Supplementary Table S18: PCR protocols for RT-PCRs on liver biopsy**

|                                                                  | <b>RT-PCR<br/>for NGS</b>            | <b>RT-PCR for exon<br/>skipping detection</b> | <b>GAPDH PCR for pre-<br/>mRNA</b>   | <b>LPA PCR for G4925A<br/>context sequence in<br/>pre-mRNA</b> |
|------------------------------------------------------------------|--------------------------------------|-----------------------------------------------|--------------------------------------|----------------------------------------------------------------|
| <b>Product length (based on<br/>Ensembl 75, ENST00000316300)</b> | 275                                  | 335<br>(152 if exon is<br>skipped)            | 113 bp spliced,<br>205 bp unspliced  | 324 bp                                                         |
| <b>Reaction vol. [μl]</b>                                        | 20                                   | 20                                            | 20                                   | 20                                                             |
| <b>Enzyme</b>                                                    | Qiagen Hotstar Taq<br>DNA Polymerase | Qiagen Hotstar Taq<br>DNA Polymerase          | Qiagen Hotstar Taq<br>DNA Polymerase | Qiagen Hotstar Taq<br>DNA Polymerase                           |
| <b>Initial denaturation</b>                                      | 95 °C, 15 min                        | 95 °C, 15 min                                 | 95 °C, 15 min                        | 95 °C, 15 min                                                  |
| <b>Denaturation</b>                                              | 94 °C, 30 s                          | 94 °C, 30 s                                   | 94 °C, 30 s                          | 94 °C, 30 s                                                    |
| <b>Annealing</b>                                                 | 60 °C, 30 s                          | 60 °C, 30 s                                   | 60 °C, 30 s                          | 60 °C, 30 s                                                    |
| <b>Extension</b>                                                 | 72 °C, 15 s                          | 72 °C, 30 s                                   | 72 °C, 60 s                          | 72 °C, 60 s                                                    |
| <b>Final extension</b>                                           | 72 °C, 10 min                        | 72 °C, 10 min                                 | 72 °C, 10 min                        | 72 °C, 10 min                                                  |
| <b>Number of cycles</b>                                          | 30                                   | 35                                            | 40                                   | 40                                                             |
| <b>Primer fw</b>                                                 | LPA_Ex4_fw                           | LPA_exon-skip_fw1                             | GAPDH for                            | LPA Ex4fw                                                      |
| <b>Primer rv</b>                                                 | LPA_Ex5_rv                           | LPA_exon-skip_rv1                             | GAPDH rev                            | 422L                                                           |
| <b>Final primer conc. [μM each]</b>                              | 0.5 μM                               | 0.5 μM                                        | 0.5 μM                               | 0.5 μM                                                         |
| <b>Final dNTP concentration [mM]</b>                             | 0.2 mM                               | 0.2 mM                                        | 0.2 mM                               | 0.2 mM                                                         |
| <b>Enzyme amount [u]</b>                                         | 2.5                                  | 2.5                                           | 0.5                                  | 0.5                                                            |
| <b>cDNA input [μl]</b>                                           | 1                                    | 1                                             | 1                                    | 1                                                              |

**Supplementary Table S19: Primer sequences protocols for RT-PCRs on liver biopsy**

| <b>Name</b>         | <b>Sequence 5'-3'</b>     |
|---------------------|---------------------------|
| LPA_exon-skip_fw1   | GGACAGAGTTATCGAGGCACATACT |
| LPA_exon-skip_rv1   | TGGTAGCACTCCTGCACCCCA     |
| GAPDH for           | CATGAGAAGTATGACAACAGCCT   |
| GAPDH rev           | AGTCCTCCACGATACCAAAGT     |
| LPA Ex4fw           | GTGGCAGCTCCTTATTGTTATACG  |
| 422L                | CACCAGAAATCACTCCGCTG      |
| LPA_Ex5_fw          | GGACAGAGTTATCGAGGCACATACT |
| LPA_Ex5_rv_skipping | TGGTAGCACTCCTGCACCCCA     |

# Supplementary Figures

## Supplementary Figure S1

Percentage of apo(a) amino acids encoded by KIV-2 depending on the number of total repeats present (calculation for one gene allele). The blue dots represent the fraction of amino acids present in the gene annotation according to hg38, which contains 15 KIV copies (i.e. 6 KIV-2 repeats). In hg38, KIV-2 encompasses only the shaded fraction of total apo(a) amino acids. In the general population, however, up to 45 KIV copies can be present (grey data points), encoding up to 70 percent of the protein (based on one gene allele).

The calculation is based on the contribution of 114 amino acids by each KIV-2 repeat, while the invariant apo(a) region consists of 1,356 amino acids.

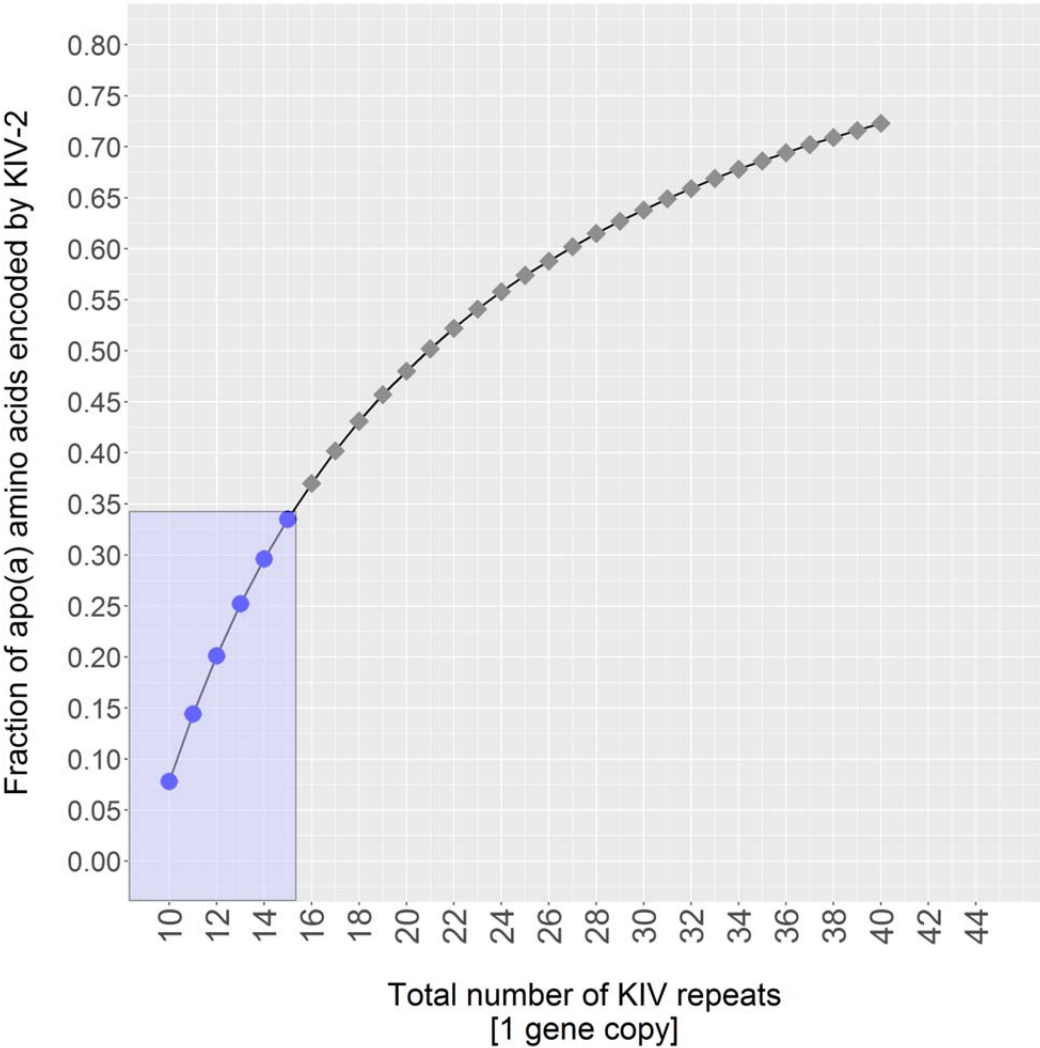

## Supplementary Figure S2

### Structure of *LPA* and apo(a)

**Top panel.** Structure of the *LPA* gene locus.

The gene structure, which is actually located on the minus strand, has been reverse-complemented for better comprehensibility and the kringle domains annotated above and below the gene structure. Each KIV repeat consists of two exons separated by a large (4 kb) intron. A small intron (1.2 kb) separates two kringles. The repetitive KIV-2 domain is colored in orange and given with 6 repeats as present in hg38. The G4925A variant is located at the last exonic base of the second exon of the KIV-2 repeat. The batch sequencing amplification primers encompass each KIV-2 element (red dotted box shows one element; see also Supplementary Fig. 3). Two previously described splice site mutations are located in KIV-7 (rs41272114<sup>30</sup>) and KIV-10 (rs143431368<sup>29</sup>).

**Bottom panel.** Structure of the apo(a) protein. Color code of top panel is used. The 1A2 antibody employed in this work is directed against KIV-2.

#### *LPA* gene locus

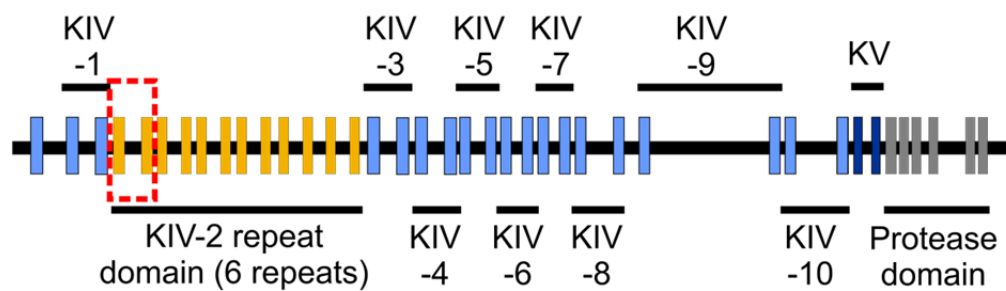

#### Apo(a) protein structure

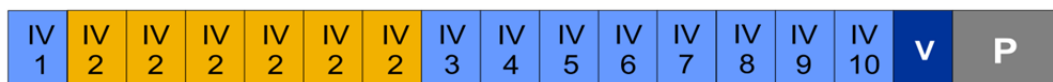

**Supplementary Figure S3**

Schematic representation of KIV-2 structure and PCR fragments used for NGS batch sequencing and minigene assays. G4925A is located at the last 3' base of KIV-2 exon 2.

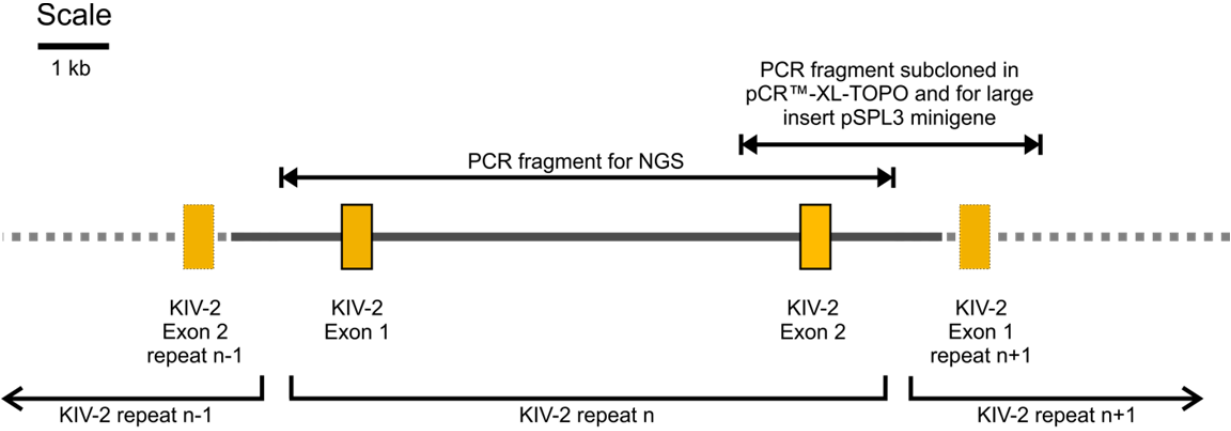



## Supplementary Figure S4

### Results of the pSPL3 minigene assays.

**a.** Structure of pSPL3 minigene. The insert encompasses the *LPA* KIV-2 exon 2 (G4925A shown in red letters) and 621 bp intronic upstream sequence, the full following intron (1.2 kb), the KIV-2 exon 1 of the next repeat element and 475 bp downstream sequence. **b.** RT-PCR image (agarose, 2.0%; both biological replicates with two technical replicates each are depicted) showing the effect of G4925A on exon splicing. wt: wild type, m: mutant, +/- P: puromycin addition for non-sense mediated mRNA decay inhibition. The mutant band shows a pronounced shift in length caused by 87 bp intron retention (c.) causing the product to shift from 606 to 693 bp. The intron sequence contains an opal stop codon (highlighted). The codons are underlined according to the reading frame. The translated product is given below. The gel image (b.) of the minigene has been cropped for concise presentation. Full gel images including all replicates are given in Supplementary Fig. 9.

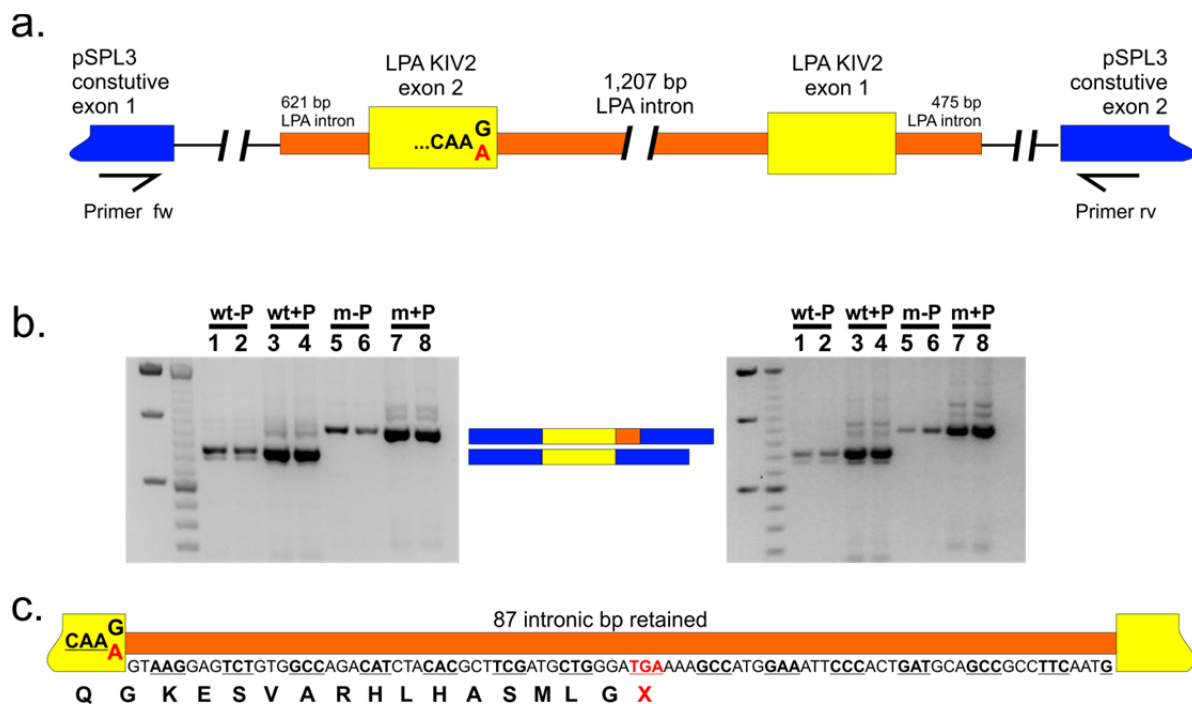

**Supplementary Figure S5**

**Estimation of number of KIV-2 repeats carrying G4925A**

Based on total number of KIV-2 divided by the mutation level observed in NGS by the total number of KIV-2 repeats estimated by KIV-2 qPCR. Given the inherent imprecision of qPCR in estimation of the exact number of KIV-2 repeats, the values must be seen as approximations.

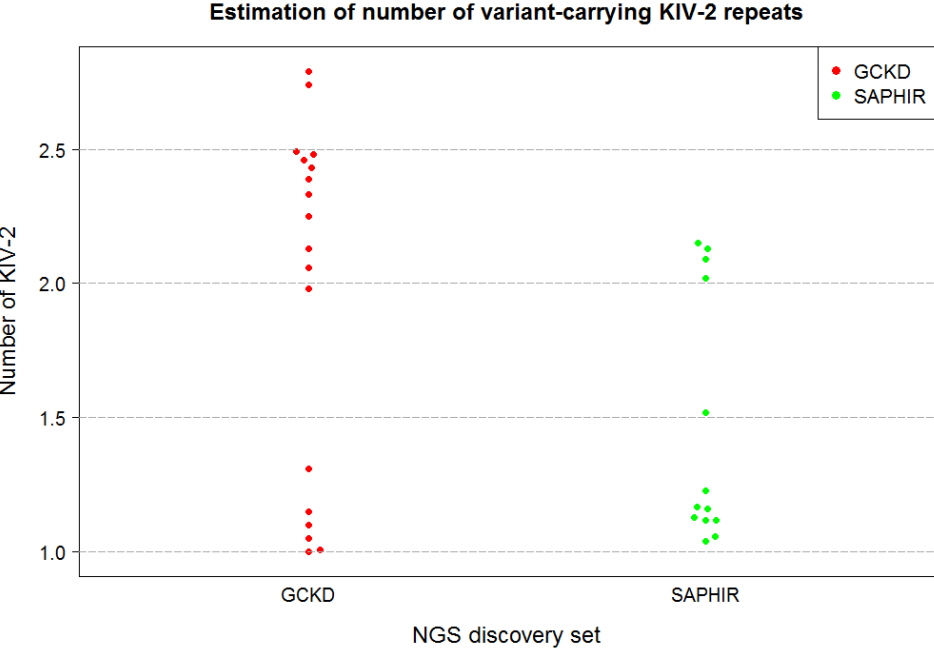

### Supplementary Figure S6

#### Median values of Lp(a) concentrations for the different isoforms groups in KORA F4.

We have already previously reported, that the Lp(a) levels drop quite sharply at 23 KIV<sup>32</sup>. It is therefore intriguing, that this corresponds, to the isoform group with the largest percentage of G4925A carriers. This figure shows that by excluding the G4925A carriers from this evaluation, this reduction is mitigated and the median in the 23 KIV group increases by 13.1 mg/dL. This implies that G4925A might be a molecular cause for this pronounced reduction at KIV 23.

Group sizes were as follows ( $n_{\text{all}}/n_{\text{non-carrier}}$ ): 11-16: 70/56, 17-19: 196/145, 20-22: 450/318, 23-25: 615/221, 26-28: 462/445, 29-31: 428/416, 32-34: 254/247, 35-37: 260/255, 37+:131/127

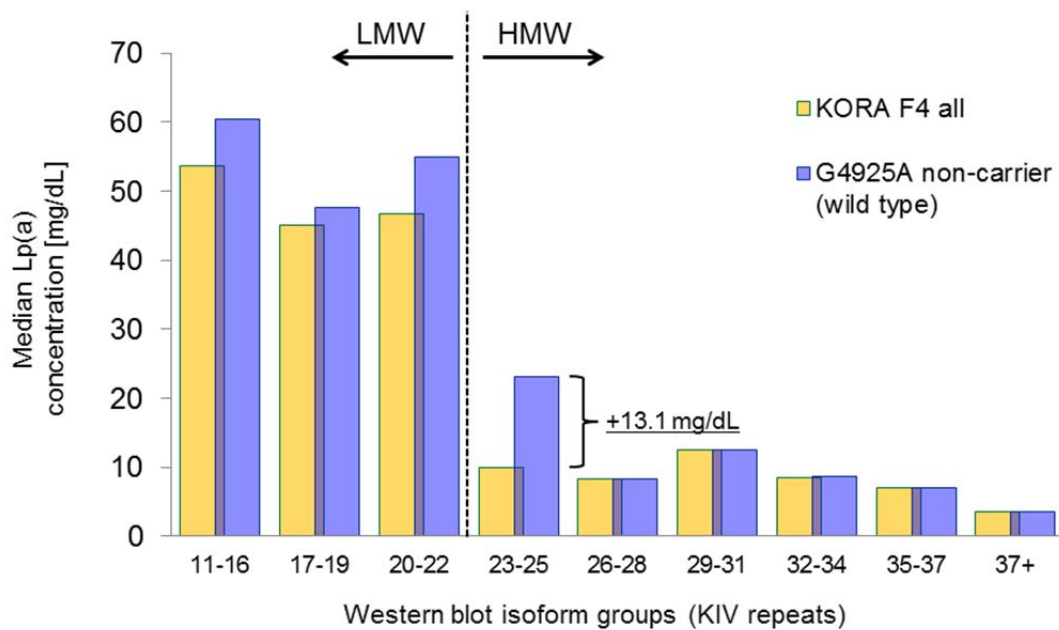

### Supplementary Figure S7

**U1/U2 consensus splice site sequence.** The gene structure and the actual sequence of the exon-intron boundary at the position of G4925A is shown below the sequence logo. The splice site at G4925A belongs to the U1/U2 subtype, which is characterized by presence of an adenine at the last exonic position in about 10% of all sites<sup>33</sup>. This hampers conclusive in silico prediction of biological effects of G4925A and requires in-vitro functional testing.

Sequence logo was generated using R package seqLogo<sup>34</sup> using probability data from the SpliceRack Website<sup>35</sup> ([http://katahdin.mssm.edu/splice/poster\\_data.html](http://katahdin.mssm.edu/splice/poster_data.html)).

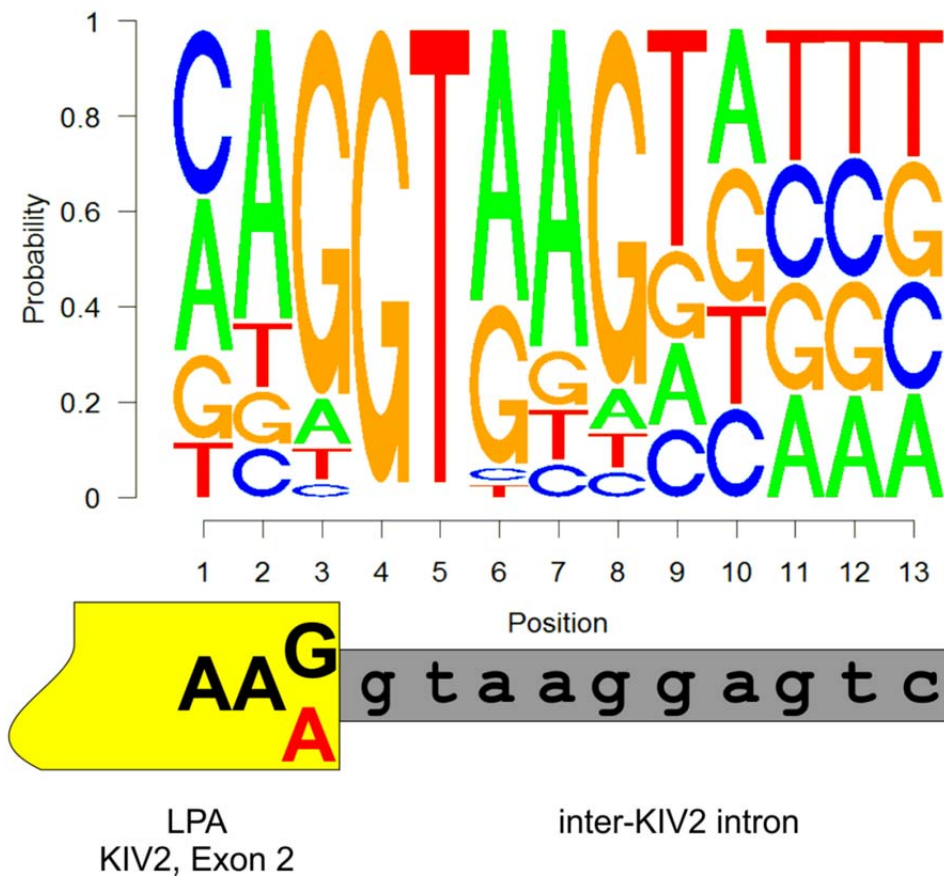

### Supplementary Figure S8

**Minigene assay**<sup>36</sup>. The exon and the intronic context sequence, respectively the genomic region to be tested (red box and dotted line) is cloned into a vector containing two constitutive exons (black and grey box), spaced by an intron. The 3' constitutive exon contains a polyadenylation site to ensure mRNA production. After transfection in an appropriate cell line, mRNA is isolated and reverse transcribed. The recombinant mRNA is amplified using primers directed against the constitutive exons. The PCR fragment size reports any unexpected changes in the mRNA fragment length, which indicates changes in splicing behavior. The change is resolved by isolating and sequencing the products. This allows detection of any changes without prior knowledge. For mutation evaluation, both alleles have to be tested and compared.

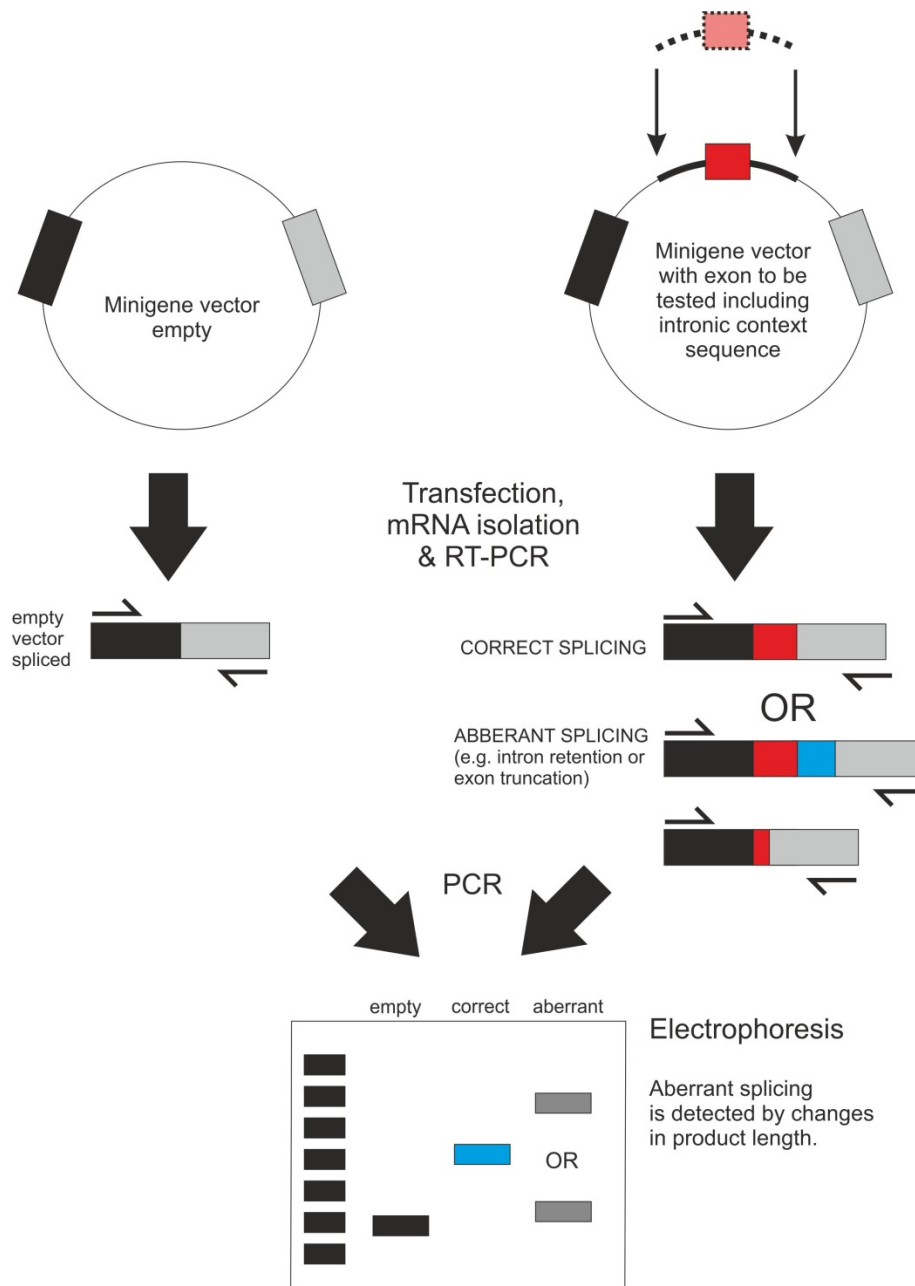

## Supplementary Figure S9

### Minigene experiments.

pSPL3 minigenes were transfected into HepG2 cells. Minigene structure and interpretation is shown in Figure 3 of the main manuscript. The experiment was carried out in two biological replicates with two technical replicates for each condition.

wt: wild type construct. m: mutant construct. +/- P: puromycin addition for non-sense mediated mRNA decay inhibition. Two different size markers are present on each gel: DNA-ladder 50 bp peqGOLD (lower molecular weight bands, blue circle, 50-1000 bp; VWR) and DNA-ladder 1 kb peqGOLD (250 bp – 10,000 bp; red circle VWR).

A red arrow marks the 500 bp marker band in each gel. The expected product size of the wild type fragment is 606 bp. No indication for pronounced non-sense mediated decay is observed, as primary band pattern is similar between the + and – puromycin group. In all experiments the same shift in the major band was observed, as determined by sequencing.

### a. pSPL3 experiment HepG2, biological replicates 1 and 2

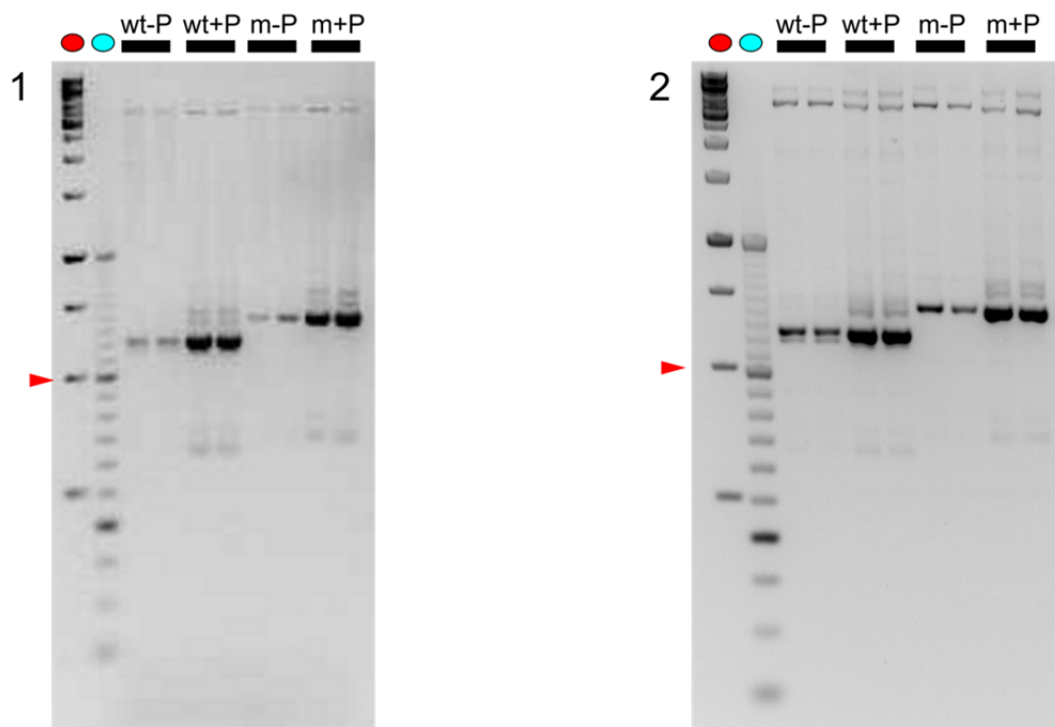

**Supplementary Figure S10**

**PCR fragment design on mRNA.** For better comprehensibility only one fragment is depicted but, similar to the batch PCR on DNA, the primer bind in each repeat and thus amplify again all repeats simultaneously. G4925A is located at the last 3' base of KIV-2 exon 2.

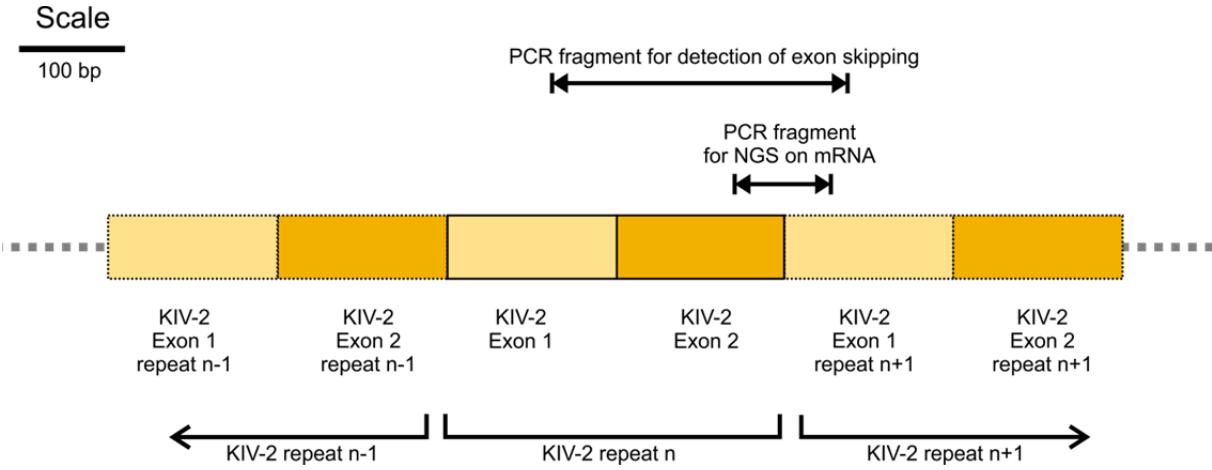

### Supplementary Figure S11

**Agarose gel for a RT-PCR spanning KIV -2 exon 2 for 4 human liver biopsies (1 G4925A-positive sample (+), 3 controls (-))**

The expected wild type product is 335 bp. In case of exon skipping, a 153 bp product would be expected. No exon skipping was observed. Most of the PCR product shows the expected length of 335 bp (red circle). Moreover a second, longer band at about ~650 was observed (blue circle). Since the primer bind in every repeat, this corresponds to a PCR product spanning two KIV-2 repeats. Each ladder band corresponds to a 50 bp step, starting at 50 bp. The bands at 300, 350, 600 and 650 bp are marked by a red triangle (from bottom to top). The approximate position of the expected exon skipping product is marked a blue triangle (Supplementary Figure S10)

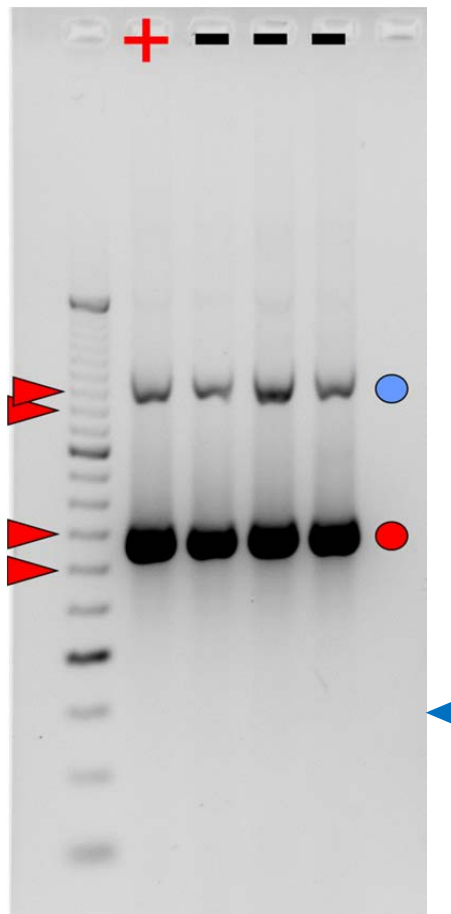



### Supplementary Figure S12

Bee-swarm scatter plot of inverse normal transformed Lp(a) values by carrier status in **a)** the total KORA F4 study, **b)** LMW apo(a) isoform carriers, **c)** HMW apo(a) isoform carriers and **d)** subgroup of the HMW carriers with WB isoforms 23-25. Horizontal lines indicate the median level (bold line) and the 25<sup>th</sup> and 75<sup>th</sup> percentile. The color coding indicates the small (respectively only) isoform.

Especially for the HMW group, it becomes obvious that carriers are clustered at isoform 23. In the non-carriers, individuals with isoform 23 (yellow dots) present rather high Lp(a) values (note the yellow top tail in wild type samples (wt) in panel c), while in G4925A carriers the Lp(a) levels are reduced (carriers in panels c and d). This effect becomes detectable only after isoform adjustment, since the reduced levels present in G4925A are close to the group's median and therefore the reduction is missed when the two groups are compared without taking isoforms into account.

[Figure on next page]

a. KORA F4, all

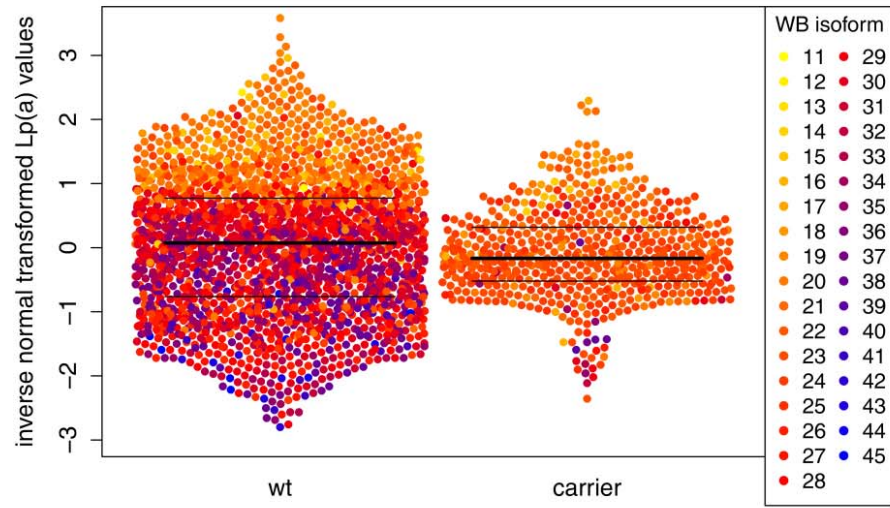

b. KORA F4, LMW carrier

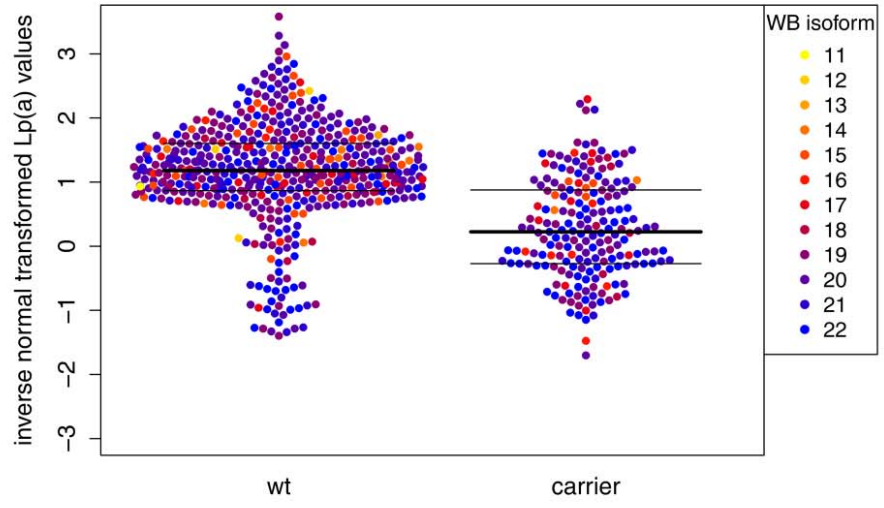

c. KORA F4, HMW carrier

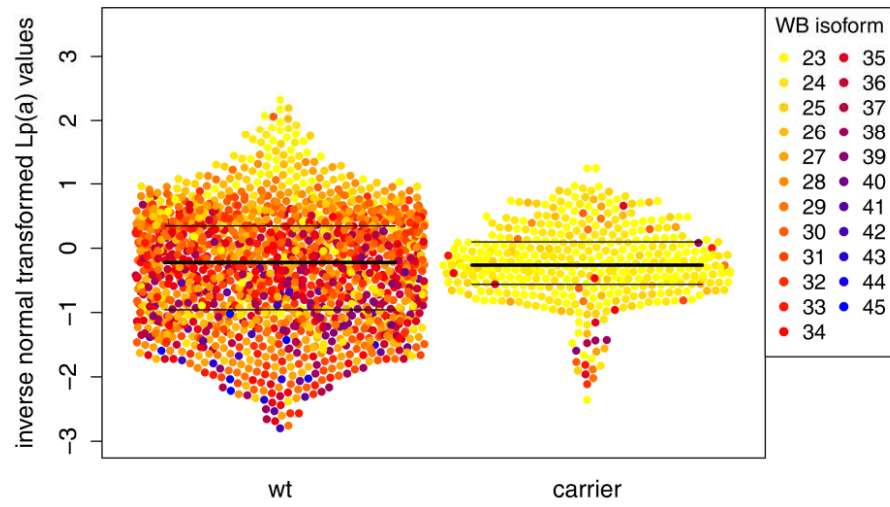

d. KORA F4, WB isoform 23 – 25

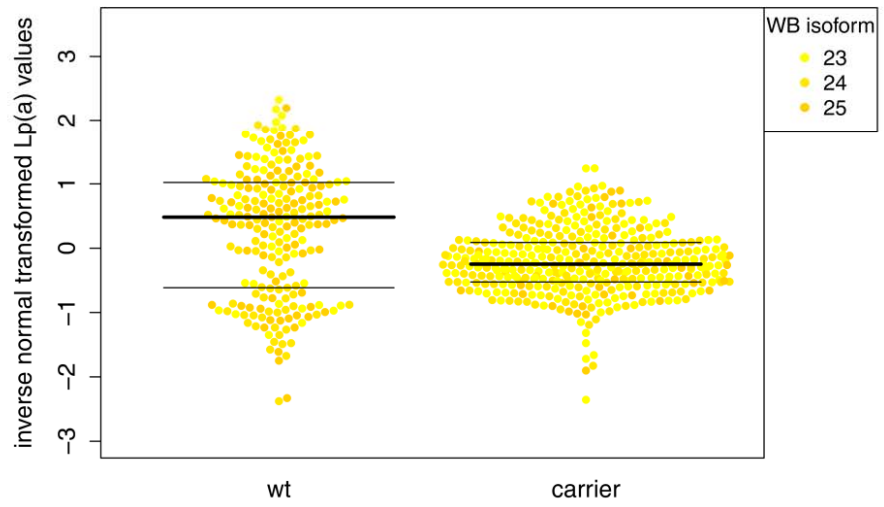

**Supplementary Figure S13**

**RNA structure at the 3' end of the KIV-2 exon 2**

Structure as provided by mFold<sup>22</sup> (<http://unafold.rna.albany.edu/?q=mfold/RNA-Folding-Form>) using standard settings. The region shows extensive double stranded structures, which are a prerequisite for RNA editing by ADARs. The position of the G4925A variant is marked by a red arrow.

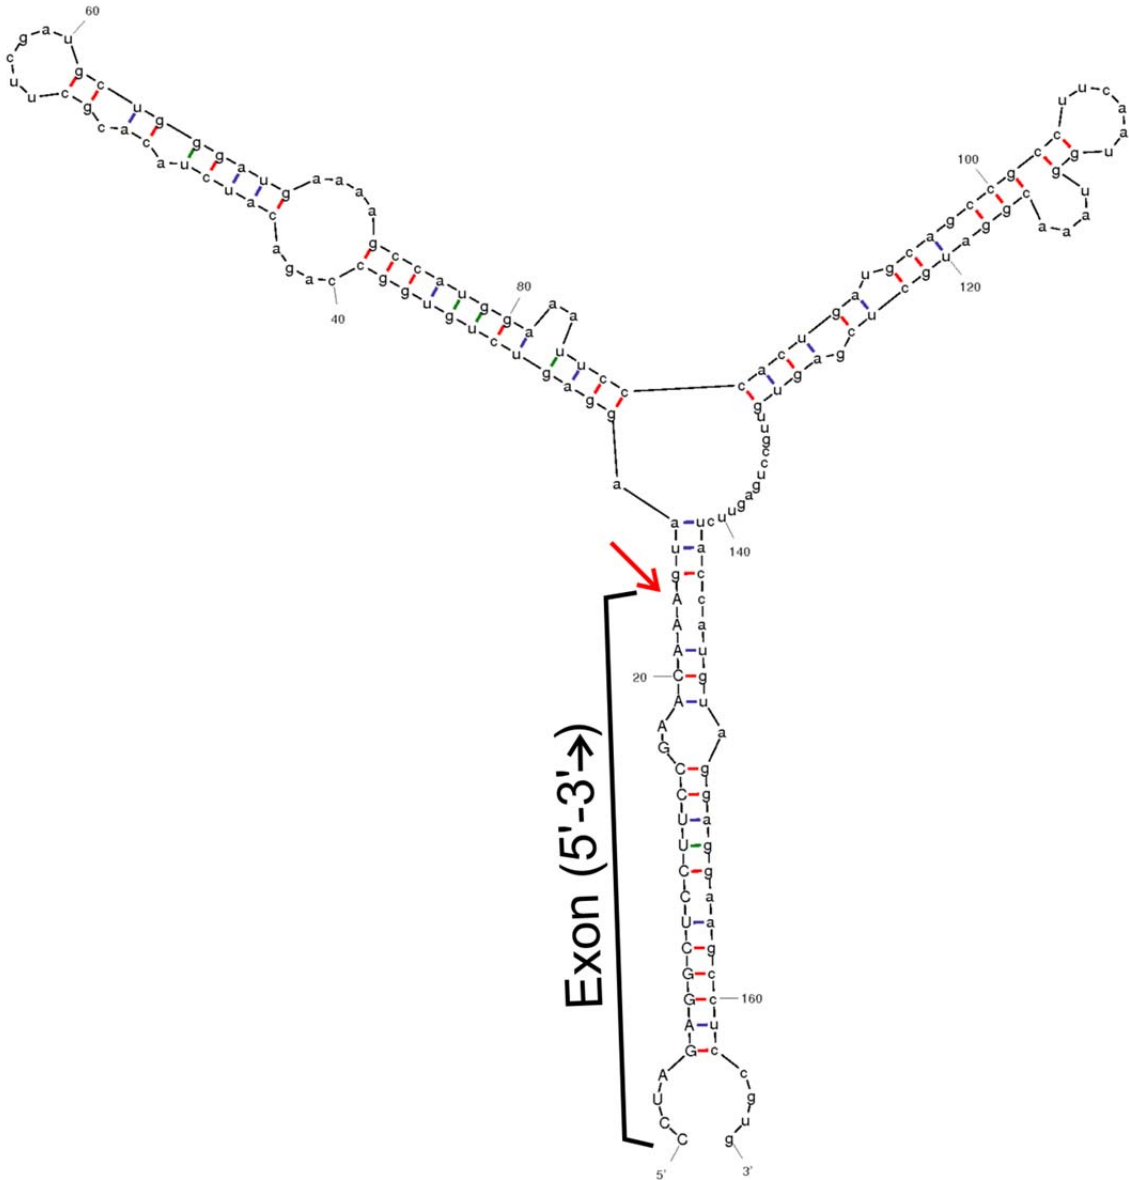

### Supplementary Figure S14

#### PCR amplicons amplifying the G4925A context sequence from pre-mRNA and control reactions on *GAPDH* of the four liver biopsy RNA samples.

Sample 1: the G4925A carrier, samples 2-4: G4925A-negative controls; Sample 5: genomic DNA sample (control). All RNA templates were treated with dsDNase. LPA pre-mRNA product was readily amplifiable from RNA samples from all four liver biopsies tested (red arrow). The faint larger band (blue arrow) corresponds to an amplification spanning two KIV-2 repeats. 2 ng of these products were diluted 1:50,000 and 1:500,000 and tested by castPCR for G4925A.

To control for genomic DNA contamination, a control amplicon spanning intron 6 of *GAPDH* was amplified from each RNA sample. Only products corresponding to a spliced template are visible (113 bp; orange arrow). A reaction on genomic DNA (5) showed the expected, larger band at 205 bp containing the intron (yellow arrow). The smaller band at the same length as the mRNA product likely stems from the known *GAPDH* retrotransposed pseudogenes on chromosomes 4, 5 and 6 (Pseudogene.org accession numbers: PGOHUM00000245994, PGOHUM00000235837, PGOHUM00000243261 as reported in UCSC Genome Browser hg19). Each marker band corresponds to 50 bp (range: 50 to 1,000 bp).

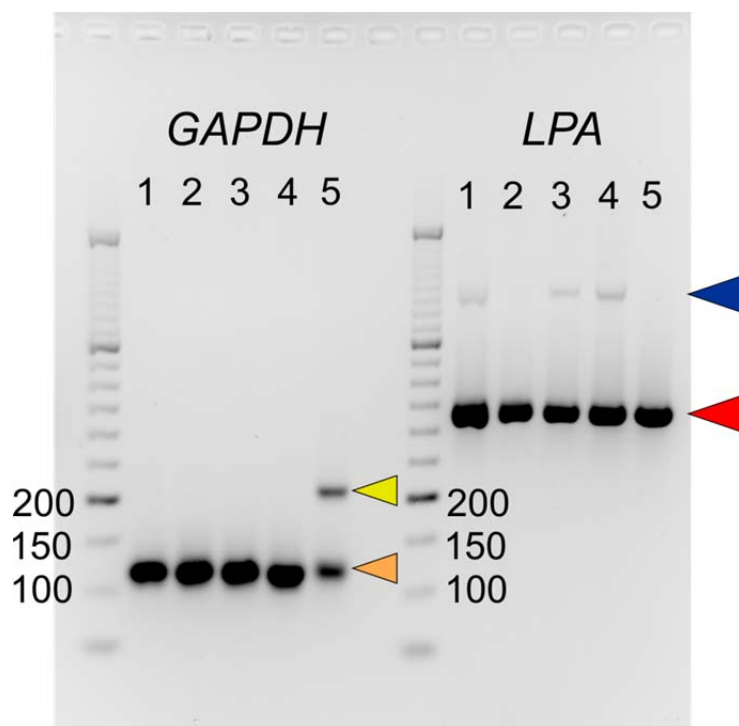

## References

1. Heid IM, Wagner SA, Gohlke H, Iglseider B, Mueller JC, Cip P, Ladurner G, Reiter R, Stadlmayr A, Mackevics V, Illig T, Kronenberg F, Paulweber B. Genetic architecture of the APM1 gene and its influence on adiponectin plasma levels and parameters of the metabolic syndrome in 1,727 healthy Caucasians. *Diabetes* 2006;**55**:375–384.
2. Eckardt K-U, Bärthlein B, Baid-Agrawal S, Beck A, Busch M, Eitner F, Ekici AB, Floege J, Gefeller O, Haller H, Hilge R, Hilgers KF, Kielstein JT, Krane V, Köttgen A, Kronenberg F, Oefner P, Prokosch H-U, Reis A, Schmid M, Schaeffner E, Schultheiss UT, Seuchter SA, Sitter T, Sommerer C, Walz G, Wanner C, Wolf G, Zeier M, Titze S. The German Chronic Kidney Disease (GCKD) study: design and methods. *Nephrol Dial Transplant* 2012;**27**:1454–1460.
3. Titze S, Schmid M, Köttgen A, Busch M, Floege J, Wanner C, Kronenberg F, Eckardt KU. Disease burden and risk profile in referred patients with moderate chronic kidney disease: Composition of the German Chronic Kidney Disease (GCKD) cohort. *Nephrol Dial Transplant* 2015;**30**:441–451.
4. Levey AS. A New Equation to Estimate Glomerular Filtration Rate. *Ann Intern Med* 2009;**150**:604.
5. Raschenberger J, Kollerits B, Titze S, Köttgen A, Bärthlein B, Ekici AB, Forer L, Schönherr S, Weissensteiner H, Haun M, Wanner C, Eckardt K-U, Kronenberg F, GCKD study Investigators. Association of relative telomere length with cardiovascular disease in a large chronic kidney disease cohort: the GCKD study. *Atherosclerosis* 2015;**242**:529–534.
6. Teslovich TM, Musunuru K, Smith A V, Edmondson AC, Stylianou IM, Koseki M, Pirruccello JP, Ripatti S, Chasman DI, Willer CJ, Johansen CT, Fouchier SW, Isaacs A, Peloso GM, Barbalic M, Ricketts SL, Bis JC, Aulchenko YS, Thorleifsson G, Feitosa MF, Chambers J, Orho-Melander M, Melander O, Johnson T, Li X, Guo X, Li M, Shin CY, Jin GM, Jin KY, et al. Biological, clinical and population relevance of 95 loci for blood lipids. *Nature* Center for Statistical Genetics, Department of Biostatistics, University of Michigan, Ann Arbor, Michigan 48109, USA; 2010;**466**:707–713.
7. Heid IM, Boes E, Müller M, Kollerits B, Lamina C, Coassin S, Gieger C, Döring A, Klopp N, Frikke-Schmidt R, Tybjaerg-Hansen A, Brandstätter A, Luchner A, Meitinger T, Wichmann H-E, Kronenberg F. Genome-wide association analysis of high-density lipoprotein cholesterol in the population-based KORA study sheds new light on intergenic regions. *Circ Cardiovasc Genet* 2008;**1**:10–20.
8. Kronenberg F, Kuen E, Ritz E, Junker R, König P, Kraatz G, Lhotta K, Mann JF, Müller GA, Neyer U, Riegel W, Reigler P, Schwenger V, Eckardstein A Von, König P, Kraatz G, Lhotta K, Mann JF, Müller GA, Neyer U, Riegel W, Reigler P, Schwenger V, Eckardstein A Von. Lipoprotein(a) serum concentrations and apolipoprotein(a) phenotypes in mild and moderate renal failure. *J Am Soc Nephrol* 2000;**11**:105–115.
9. Kraft HG, Lingenhel A, Bader G, Kostner GM, Utermann G. The relative electrophoretic mobility of apo(a) isoforms depends on the gel system: proposal of a nomenclature for apo(a) phenotypes. *Atherosclerosis* Institute for Medical Biology and Human Genetics, University of Innsbruck, Austria; 1996;**125**:53–61.

10. Lanktree MB, Rajakumar C, Brunt JH, Koschinsky ML, Connelly PW, Hegele RA. Determination of lipoprotein(a) kringle repeat number from genomic DNA: copy number variation genotyping using qPCR. *J Lipid Res* 2009;**50**:768–772.
11. Livak KJ, Schmittgen TD. Analysis of relative gene expression data using real-time quantitative PCR and the 2<sup>(-Delta Delta C(T))</sup> Method. *Methods Applied Biosystems*, Foster City, California 94404, USA; 2001;**25**:402–408.
12. Payne BAI, Gardner K, Coxhead J, Chinnery PF. Deep resequencing of mitochondrial DNA. *Methods Mol Biol* 2015;**1264**:59–66.
13. Weissensteiner H, Forer L, Fuchsberger C, Schöpf B, Kloss-Brandstätter A, Specht G, Kronenberg F, Schönherr S. mtDNA-Server: next-generation sequencing data analysis of human mitochondrial DNA in the cloud. *Nucleic Acids Res* 2016;**44**:W64–9.
14. Ye K, Lu J, Ma F, Keinan A, Gu Z. Extensive pathogenicity of mitochondrial heteroplasmy in healthy human individuals. *Proc Natl Acad Sci* 2014;**111**:10654–10659.
15. Ratan A, Olson TL, Loughran TP, Miller W. Identification of indels in next-generation sequencing data. *BMC Bioinformatics* 2015;**16**:42.
16. Auton A, Abecasis GR, Altshuler DM, Durbin RM, Abecasis GR, Bentley DR, Chakravarti A, Clark AG, Donnelly P, Eichler EE, Flicek P, Gabriel SB, Gibbs RA, Green ED, Hurles ME, Knoppers BM, Korbel JO, Lander ES, Lee C, Lehrach H, Mardis ER, Marth GT, McVean GA, Nickerson DA, Schmidt JP, Sherry ST, Wang J, Wilson RK, Gibbs RA, Boerwinkle E, et al. A global reference for human genetic variation. *Nature* 2015;**526**:68–74.
17. Li H, Handsaker B, Wysoker A, Fennell T, Ruan J, Homer N, Marth G, Abecasis G, Durbin R. The Sequence Alignment/Map format and SAMtools. *Bioinformatics* 2009;**25**:2078–2079.
18. Morlan J, Baker J, Sinicropi D. Mutation detection by real-time PCR: a simple, robust and highly selective method. *PLoS One* 2009;**4**:e4584.
19. Noreen A, Fresser F, Utermann G, Schmidt K. Sequence Variation within the KIV-2 Copy Number Polymorphism of the Human LPA Gene in African, Asian, and European Populations. *PLoS One* 2015;**10**:e0121582.
20. Liu H, Naismith JH. An efficient one-step site-directed deletion, insertion, single and multiple-site plasmid mutagenesis protocol. *BMC Biotechnol* 2008;**8**:91.
21. Houdayer C, Dehainault C, Mattler C, Michaux D, Caux-Moncoutier V, Pages-Berhouet S, D’Enguien CD, Lauge A, Castera L, Gauthier-Villars M, Stoppa-Lyonnet D. Evaluation of in silico splice tools for decision-making in molecular diagnosis. *Hum Mutat* 2008;**29**:975–982.
22. Zuker M. Mfold web server for nucleic acid folding and hybridization prediction. *Nucleic Acids Res* 2003;**31**:3406–3415.
23. Kronenberg F, Utermann G. Lipoprotein(a): resurrected by genetics. *J Intern Med* 2013;**273**:6–30.
24. Erqou S, Thompson A, Angelantonio E Di, Saleheen D, Kaptoge S, Marcovina S, Danesh J. Apolipoprotein(a) isoforms and the risk of vascular disease: systematic review of 40 studies involving 58,000 participants. *J Am Coll Cardiol* 2010;**55**:2160–2167.
25. Kinpara K, Okada H, Yoneyama A, Okubo M, Murase T. Lipoprotein(a)-cholesterol: a significant component of serum cholesterol. *Clin Chim Acta* 2011;**412**:1783–1787.

26. Willer CJ, Schmidt EM, Sengupta S, Peloso GM, Gustafsson S, Kanoni S, Ganna A, Chen J, Buchkovich ML, Mora S, Beckmann JS, Bragg-Gresham JL, Chang HY, Demirkan A, Hertog HM, Den, Do R, Donnelly LA, Ehret GB, Esko T, Feitosa MF, Ferreira T, Fischer K, Fontanillas P, Fraser RM, Freitag DF, Gurdasani D, Heikkila K, Hypponen E, Isaacs A, Jackson AU, et al. Discovery and refinement of loci associated with lipid levels. *Nat Genet* 2013;**45**:1274–1283.
27. Marchini J, Howie B, Myers S, McVean G, Donnelly P. A new multipoint method for genome-wide association studies by imputation of genotypes. *Nat Genet* 2007;**39**:906–913.
28. Fuchsberger C, Forer L, Schönherr S, Kronenberg F, Abecasis G. Imputation server: next generation genotype imputation service. *Present 64th Annu Meet Am Soc Hum Genet Oct 20, 2014, San Diego, CA, USA 2014*;
29. Lim ET, Würtz P, Havulinna AS, Palta P, Tukiainen T, Rehnström K, Esko T, Mägi R, Inouye M, Lappalainen T, Chan Y, Salem RM, Lek M, Flannick J, Sim X, Manning A, Ladenvall C, Bumpstead S, Hämäläinen E, Aalto K, Maksimow M, Salmi M, Blankenberg S, Ardissino D, Shah S, Horne B, McPherson R, Hovingh GK, Reilly MP, Watkins H, et al. Distribution and medical impact of loss-of-function variants in the Finnish founder population. *PLoS Genet* 2014;**10**:e1004494.
30. Ogorelkova M, Gruber A, Utermann G. Molecular basis of congenital lp(a) deficiency: a frequent apo(a) ‘null’ mutation in caucasians. *Hum Mol Genet* 1999;**8**:2087–2096.
31. Bottillo I, Luca A De, Schirinzi A, Guida V, Torrente I, Calvieri S, Gervasini C, Larizza L, Pizzuti A, Dallapiccola B. Functional analysis of splicing mutations in exon 7 of NF1 gene. *BMC Med Genet* IRCCS-CSS, San Giovanni Rotondo and CSS-Mendel Institute, Rome, Italy; 2007;**8**:4.
32. Laschkolnig A, Kollerits B, Lamina C, Meisinger C, Rantner B, Stadler M, Peters A, Koenig W, Stöckl A, Dähnhardt D, Böger CA, Krämer BK, Fraedrich G, Strauch K, Kronenberg F. Lipoprotein (a) concentrations, apolipoprotein (a) phenotypes, and peripheral arterial disease in three independent cohorts. *Cardiovasc Res* 2014;**103**:28–36.
33. Sibley CR, Blazquez L, Ule J. Lessons from non-canonical splicing. *Nat Rev Genet* 2016;**17**:407–421.
34. Bembom O. seqLogo: Sequence logos for DNA sequence alignments. 2016.
35. Sheth N. Comprehensive splice-site analysis using comparative genomics. *Nucleic Acids Res* 2006;**34**:3955–3967.
36. Gaildrat P, Killian A, Martins A, Tournier I, Frébourg T, Tosi M. Use of Splicing Reporter Minigene Assay to Evaluate the Effect on Splicing of Unclassified Genetic Variants. *Methods Mol Biol* 2010;**653**:249–257.
